# Supplementary material
Source: PubMed Central journal article supplement (PMC5262503)
Supplement: NIHMS840205-supplement-Supp.pdf [file NIHMS840205-supplement-Supp.pdf]

**Supplemental Material for:**

**Metal-Assisted Oxygen Atom Addition to an Fe(III)-Thiolate.**

Gloria Villar-Acevedo, Priscilla Lugo-Mas, Maike N. Blakely, Julian A. Rees, Abbie S. Ganas, Erin M. Hanada, Werner Kaminsky,<sup>§</sup> and \*Julie A. Kovacs

|                                                                                                                                                                                                                                                                                                                                      | Page    |
|--------------------------------------------------------------------------------------------------------------------------------------------------------------------------------------------------------------------------------------------------------------------------------------------------------------------------------------|---------|
| <b>Experimental Details:</b>                                                                                                                                                                                                                                                                                                         |         |
| Synthetic Route to Thiol Ligand $(\text{HS}^{\text{Me}})_2(\text{N}^{\text{Me}})(\text{HN}^{\text{amide}})_2(\text{Pr},\text{Pr})\cdot\text{HCl}$ ( <b>C</b> ).                                                                                                                                                                      | S4-S6   |
| Synthesis of 2-benzylsulfanyl-2-methyl propionic acid ( <b>A</b> ).                                                                                                                                                                                                                                                                  | S4-S5   |
| Synthesis of benzyl-protected $\text{Bz}_2\text{S}_2^{\text{Me}_2}\text{N}^{\text{Me}}(\text{HN})_2^{\text{amide}}(\text{Pr},\text{Pr})$ ( <b>B</b> ).                                                                                                                                                                               | S5      |
| <b>Supplemental Figures:</b>                                                                                                                                                                                                                                                                                                         |         |
| <b>Scheme S1.</b> Synthetic Route to Thiol Ligand $(\text{HS}^{\text{Me}})_2(\text{N}^{\text{Me}})(\text{HN}^{\text{amide}})_2(\text{Pr},\text{Pr})\cdot\text{HCl}$ ( <b>C</b> ).                                                                                                                                                    | S4      |
| <b>Figure S-1.</b> Quantitative electronic absorption spectrum of $[\text{Fe}^{\text{III}}(\eta^2\text{-S}^{\text{Me}_2}\text{O})(\text{S}^{\text{Me}_2}\text{N}_3(\text{Pr},\text{Pr}))](\text{PF}_6)$ ( <b>5</b> ) in MeOH at 298 K.                                                                                               | S7      |
| <b>Figure S-2.</b> ESI-MS of the product obtained upon addition of PhIO to <b>2</b> in MeOH, demonstrating that the $m/z$ increases by 16, relative to the parent compound, consistent with the addition of an oxo atom.                                                                                                             | S7      |
| <b>Figure S-3.</b> Electronic absorption spectrum of $[\text{Fe}^{\text{III}}(\text{S}_2^{\text{Me}_2}\text{N}_3(\text{Pr},\text{Pr}))]^+$ ( <b>2</b> ) and the magenta product formed upon addition of 1 equiv of $\text{H}_2\text{O}_2$ in MeOH.                                                                                   | S8      |
| <b>Figure S-4.</b> Cyclic voltammogram of $[\text{Fe}^{\text{III}}(\eta^2\text{-S}^{\text{Me}_2}\text{O})(\text{S}^{\text{Me}_2}\text{N}_3(\text{Pr},\text{Pr}))]^+$ ( <b>5</b> ) in MeCN at 298 K (0.1 M $(\text{Bu}_4\text{N})\text{PF}_6$ , glassy carbon electrode, 150 mV/sec scan rate). Peak potentials versus SCE indicated. | S8      |
| <b>Figure S-5.</b> IR spectrum of $[\text{Fe}^{\text{III}}(\eta^2\text{-S}^{\text{Me}_2}\text{O})(\text{S}^{\text{Me}_2}\text{N}_3(\text{Pr},\text{Pr}))](\text{Cl})$ ( <b>5</b> ) (KBr pellet).                                                                                                                                     | S9      |
| <b>Figure S-6.</b> ESI mass spec of (Pr,Pr) amide- $(\text{S}^{\text{Me}}\text{H})_2(\text{N}^{\text{Me}})(\text{N}^{\text{amide}}\text{H})_2$ ( <b>C</b> ) ligand.                                                                                                                                                                  | S9      |
| <b>Figure S-7.</b> $^1\text{H}$ NMR of (Pr,Pr) amide- $(\text{S}^{\text{Me}}\text{H})_2(\text{N}^{\text{Me}})(\text{N}^{\text{amide}}\text{H})_2$ ( <b>C</b> ) ligand in $\text{CDCl}_3$ .                                                                                                                                           | S10     |
| <b>Figure S-8.</b> $^1\text{H}$ NMR of (Pr,Pr) amide- $(\text{S}^{\text{Me}}\text{H})_2(\text{N}^{\text{Me}})(\text{N}^{\text{amide}}\text{H})_2$ ( <b>C</b> ) in $\text{D}_2\text{O}$ .                                                                                                                                             | S10     |
| <b>Figure S-9.</b> IR spectrum of (Pr,Pr) amide- $(\text{S}^{\text{Me}}\text{H})_2(\text{N}^{\text{Me}})(\text{N}^{\text{amide}}\text{H})_2$ ( <b>C</b> ) ligand, showing the $\nu_{\text{SH}}$ stretch at $2496\text{ cm}^{-1}$ .                                                                                                   | S11     |
| <b>Figure S-10.</b> ESI mass spec of $(\text{Et}_4\text{N})[\text{Fe}^{\text{III}}\text{S}_2^{\text{Me}_2}\text{N}^{\text{Me}}\text{N}_2^{\text{amide}}(\text{Pr},\text{Pr})]$ ( <b>8</b> ).                                                                                                                                         | S11     |
| <b>Figure S-11.</b> IR spectrum of $(\text{Et}_4\text{N})[\text{Fe}^{\text{III}}\text{S}_2^{\text{Me}_2}\text{N}^{\text{Me}}\text{N}_2^{\text{amide}}(\text{Pr},\text{Pr})]$ ( <b>8</b> ) (KBr pellet).                                                                                                                              | S12     |
| <b>Figure S-12.</b> X-band EPR spectrum of $(\text{Et}_4\text{N})[\text{Fe}^{\text{III}}\text{S}_2^{\text{Me}_2}\text{N}^{\text{Me}}\text{N}_2^{\text{amide}}(\text{Pr},\text{Pr})]$ ( <b>8</b> ) in MeOH/EtOH glass at 7 K.                                                                                                         | S12     |
| <b>Figure S-13.</b> Monitoring the formation of a green intermediate via the addition of 10 equiv of iodosylbenzene (PhIO) to $[\text{Fe}^{\text{III}}(\text{S}_2^{\text{Me}_2}\text{N}_3(\text{Pr},\text{Pr}))]^+$ ( <b>2</b> ) in MeOH at $-73\text{ }^\circ\text{C}$ .                                                            | S13     |
| <b>Figure S-14.</b> Monitoring the conversion of the intermediate formed in the reaction between 10 equiv of iodosylbenzene (PhIO) and five-coordinate $[\text{Fe}^{\text{III}}(\text{S}_2^{\text{Me}_2}\text{N}_3(\text{Pr},\text{Pr}))]^+$ ( <b>2</b> ) (MeOH at $-73\text{ }^\circ\text{C}$ ) to sulfenate-ligated <b>5</b> .     | S13     |
| <b>Supplementary Tables:</b>                                                                                                                                                                                                                                                                                                         |         |
| <b>Table S-1.</b> Metrical Parameters for DFT-Optimized versus Crystallographically-Determined Structures <b>2</b> and <b>8</b>                                                                                                                                                                                                      | S14     |
| <b>Table S-2.</b> Crystal Data for $[\text{Fe}^{\text{III}}(\eta^2\text{-S}^{\text{Me}_2}\text{O})(\text{S}^{\text{Me}_2}\text{N}_3(\text{Pr},\text{Pr}))](\text{PF}_6)$ ( <b>5</b> ).                                                                                                                                               | S15     |
| <b>Table S-3.</b> Positional and Equivalent Isotropic Thermal Parameters for $[\text{Fe}^{\text{III}}(\eta^2\text{-S}^{\text{Me}_2}\text{O})(\text{S}^{\text{Me}_2}\text{N}_3(\text{Pr},\text{Pr}))](\text{PF}_6)$ ( <b>5</b> ).                                                                                                     | S16     |
| <b>Table S-4.</b> Bond Distances ( $\text{\AA}$ ) and Angles (deg) for $[\text{Fe}^{\text{III}}(\eta^2\text{-$                                                                                                                                                                                                                       | S17-S21 |

|                                                                                                                                                                                                                                      |         |
|--------------------------------------------------------------------------------------------------------------------------------------------------------------------------------------------------------------------------------------|---------|
| $S^{\text{Me}_2\text{O}}(S^{\text{Me}_2}\text{N}_3(\text{Pr},\text{Pr}))(\text{PF}_6)$ ( <b>5</b> ).                                                                                                                                 |         |
| <b>Table S-5.</b> Anisotropic Thermal Parameters for $[\text{Fe}^{\text{III}}(\eta^2-S^{\text{Me}_2}\text{O})(S^{\text{Me}_2}\text{N}_3(\text{Pr},\text{Pr}))(\text{PF}_6)]$ ( <b>5</b> ).                                           | S22     |
| <b>Table S-6.</b> Hydrogen Atoms for $[\text{Fe}^{\text{III}}(\eta^2-S^{\text{Me}_2}\text{O})(S^{\text{Me}_2}\text{N}_3(\text{Pr},\text{Pr}))(\text{PF}_6)]$ ( <b>5</b> ).                                                           | S23     |
| <b>Table S-7.</b> Crystal Data for $(\text{Et}_4\text{N})[\text{Fe}^{\text{III}}\text{S}_2^{\text{Me}_2}\text{N}^{\text{Me}}\text{N}_2^{\text{amide}}(\text{Pr},\text{Pr})]$ ( <b>8</b> ).                                           | S24-S25 |
| <b>Table S-8.</b> Positional and Equivalent Isotropic Thermal Parameters for $(\text{Et}_4\text{N})[\text{Fe}^{\text{III}}\text{S}_2^{\text{Me}_2}\text{N}^{\text{Me}}\text{N}_2^{\text{amide}}(\text{Pr},\text{Pr})]$ ( <b>8</b> ). | S26     |
| <b>Table S-9.</b> Bond Distances (Å) and Angles (deg) for $(\text{Et}_4\text{N})[\text{Fe}^{\text{III}}\text{S}_2^{\text{Me}_2}\text{N}^{\text{Me}}\text{N}_2^{\text{amide}}(\text{Pr},\text{Pr})]$ ( <b>8</b> ).                    | S27-S36 |
| <b>Table S-10.</b> Anisotropic Thermal Parameters for $(\text{Et}_4\text{N})[\text{Fe}^{\text{III}}\text{S}_2^{\text{Me}_2}\text{N}^{\text{Me}}\text{N}_2^{\text{amide}}(\text{Pr},\text{Pr})]$ ( <b>8</b> ).                        | S37     |
| <b>Table S-11.</b> Hydrogen Atoms for $(\text{Et}_4\text{N})[\text{Fe}^{\text{III}}\text{S}_2^{\text{Me}_2}\text{N}^{\text{Me}}\text{N}_2^{\text{amide}}(\text{Pr},\text{Pr})]$ ( <b>8</b> ).                                        | S38-S39 |

## Experimental Details

**Synthetic Route to Thiol Ligand  $(\text{HS}^{\text{Me}})_2(\text{N}^{\text{Me}})(\text{HN}^{\text{amide}})_2(\text{Pr},\text{Pr})\cdot\text{HCl}$  (C).** The protonated bis-thiol bis-carboxamide ligand,  $(\text{HS}^{\text{Me}})_2(\text{N}^{\text{Me}})(\text{HN}^{\text{amide}})_2(\text{Pr},\text{Pr})\cdot\text{HCl}$  (C), was synthesized in reasonable yields according to the three step synthesis outlined in Scheme S1. Addition of benzyl mercaptan to ethyl 2-bromo-2-methyl propionate in the presence of base afforded **A** in 80% yield. In situ formation of the thionyl chloride derivative of **7**, followed by the addition of 3,3'-diamino-*N*-methylpropylamine yielded benzyl-protected Pr,Pr amide- $(\text{Bz}_2\text{S}_2^{\text{Me}_2\text{N}^{\text{Me}}\text{N}_2^{\text{amide}})$  (**B**). Deprotection of the sulfurs using  $\text{Na}/\text{NH}_3$  followed by the addition of  $\text{HCl}$  afforded the hydrochloride salt of  $(\text{HS}^{\text{Me}})_2(\text{N}^{\text{Me}})(\text{HN}^{\text{amide}})_2(\text{Pr},\text{Pr})$  (C), as determined by ESI-MS (Figure S-6) and elemental analysis. Evidence for the presence of the free thiols was obtained by  $^1\text{H-NMR}$  (Figure S-7 and Figure S-8) and FT-IR spectroscopy ( $\nu_{\text{SH}} = 2496 \text{ cm}^{-1}$ , Figure S-9).

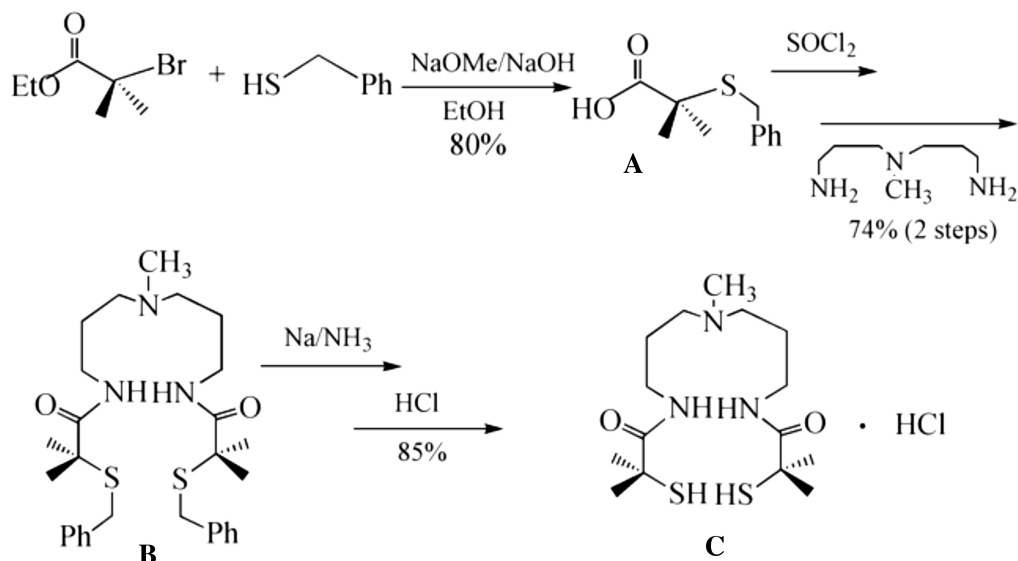

Scheme S1.

**Synthesis of 2-benzylsulfanyl-2-methyl propionic acid (A).** To a stirred solution of ethyl 2-bromo-2-methyl propionate (15.0 mL, 102.5 mmol) in  $\text{EtOH}$  (340 mL) was added  $\text{NaOMe}$  (5.5 g,

102.5 mmol) followed by benzyl mercaptan (12.0 mL, 102.2 mmol). After stirring at 90 °C for 3.5 h, NaOH (5.3 g, 133.3 mmol) was added. The solution was filtered, and the solid recovered was washed with the minimum amount of EtOH. The solid was dissolved in H<sub>2</sub>O (25 mL), and concentrated HCl was added dropwise until the solution reached pH=2. After filtration, the solid was dried *in vacuo* overnight to afford **A** (17.3 g, 81.2, 80%) as a white powder. <sup>1</sup>H NMR (CDCl<sub>3</sub>, 301 MHz): δ 7.35-7.32 (m, 5H), 3.93 (s, 2H), 1.60 (s, 6H). ESI-MS calcd for [C<sub>11</sub>H<sub>14</sub>O<sub>2</sub>S + Na]<sup>+</sup>: 233.3, found 233.0.

**Synthesis of benzyl-protected Bz<sub>2</sub>S<sub>2</sub><sup>Me</sup><sub>2</sub>N<sup>Me</sup>(HN)<sub>2</sub><sup>amide</sup>(Pr,Pr) (**B**).** To a stirred solution of 2-benzylsulfanyl-2-methyl propionic acid (**7**, 10.0 g, 47.6 mmol), placed in an ambient temperature H<sub>2</sub>O bath, was added thionyl chloride (17.0 mL, 233.1 mmol). After 30 min, the excess thionyl chloride was removed under *vacuo*. The crude acid chloride derivative, 2-benzylsulfanyl-2-methyl-propionyl chloride, was used immediately in the next step without further purification.

To a stirred solution of 2-benzylsulfanyl-2-methyl-propionyl chloride (10.8 g, 47.4 mmol) in acetone (25 mL) at ambient temperature was added 3,3'-diamino-*N*-methyldipropylamine (7.7 mL, 47.8 mmol) followed by Et<sub>3</sub>N (20.0 mL, 143.5 mmol). After stirring for 6 h, saturated aqueous NH<sub>4</sub>Cl (20 mL) was added. The aqueous layer was extracted (3 x 20 mL) with Et<sub>2</sub>O. The combined organic layers were washed with H<sub>2</sub>O and brine (20 mL each), dried over Na<sub>2</sub>SO<sub>4</sub>, and concentrated *in vacuo* to yield **B** (17.2 g, 32.5 mmol, 74% (2 steps)) as a light yellow oil. <sup>1</sup>H NMR (CDCl<sub>3</sub>, 300 MHz): 7.46 (m, 2H), 7.36-7.20 (m, 10H), 3.74 (s, 4H), 3.22 (m, 4H), 2.40 (t, 4H), 2.21 (s, 3H), 1.64 (m, 4H), 1.54 (s, 12H); IR (KBr pellet): 3352 (N-H), 1651 (C=O) cm<sup>-1</sup>; ESI-MS calcd for C<sub>29</sub>H<sub>43</sub>N<sub>3</sub>O<sub>2</sub>S<sub>2</sub>: 529.8, found 530.6.

**Synthesis of Thiol Ligand (HS<sup>Me</sup>)<sub>2</sub>(N<sup>Me</sup>)(HN<sup>amide</sup>)<sub>2</sub>(Pr,Pr) hydrochloride (C).** To a stirred solution of liquid ammonia (~50 mL), sodium metal (200 mg) was added to afford an intense blue solution. To this blue solution was added 1 mL aliquots of a solution of **B** (10.0 g, 18.9 mmol) dissolved in diethyl ether (12 mL). Additional sodium was periodically added in small proportions to maintain the deep blue color of the solution. The completion of the reaction was assumed once the solution maintained its deep blue color for more than 30 min. The reaction was then quenched with NH<sub>4</sub>Cl (200 mg), and the remaining liquid ammonia was evaporated under a stream of N<sub>2</sub>. The resulting solid was dissolved in MeOH (15 mL), and conc. HCl was then added until the solution reached pH=2. The solution was concentrated *in vacuo*, the solid obtained redissolved in CH<sub>3</sub>CN (15 mL), then filtered and the solvent evaporated under reduced pressure to afford a light brown glassy paste. Trituration with Et<sub>2</sub>O yielded **C** (5.6 g, 16.0 mmol, 85%) as a white powder. <sup>1</sup>H NMR (D<sub>2</sub>O, 301 MHz): δ 3.15 (t, 4H), 2.97 (m, 4H), 2.68 (s, 3H), 2.03 (s, 2H), 1.77 (m, 4H), 1.38 (s, 12H); IR (KBr pellet): 3349 (N-H), 2496 (S-H), 1640 (C=O) cm<sup>-1</sup>; ESI-MS calcd for C<sub>15</sub>H<sub>31</sub>N<sub>3</sub>O<sub>2</sub>S<sub>2</sub>: 349.6, found 350.4; Anal. Calcd. for C<sub>15</sub>H<sub>32</sub>N<sub>3</sub>O<sub>2</sub>S<sub>2</sub>Cl: C, 46.7; H, 8.4; N, 10.9. Found: C, 46.3; H, 8.4; N, 11.0.

## Supplemental Figures

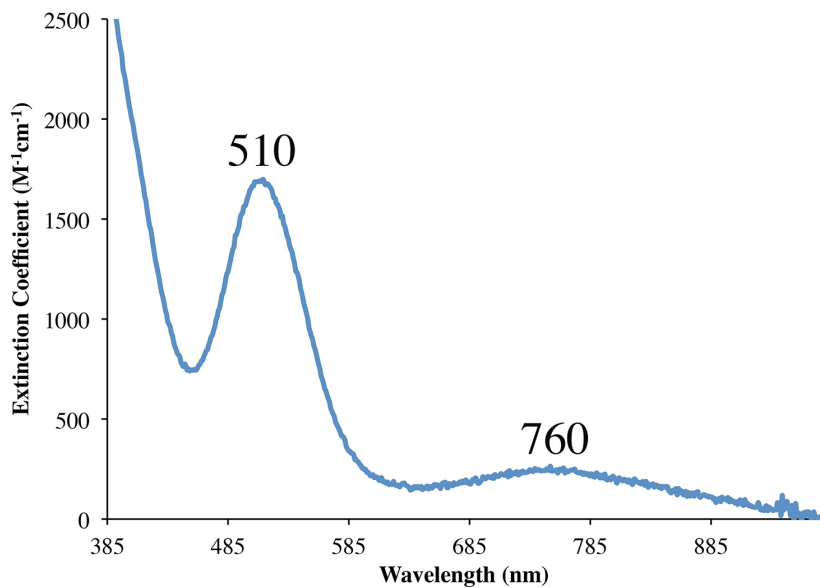

**Figure S-1.** Quantitative electronic absorption spectrum of [Fe<sup>III</sup>( $\eta^2$ -S<sup>Me2</sup>O)(S<sup>Me2</sup>N<sub>3</sub>(Pr,Pr))](PF<sub>6</sub>) (**5**) in MeOH at 298 K.

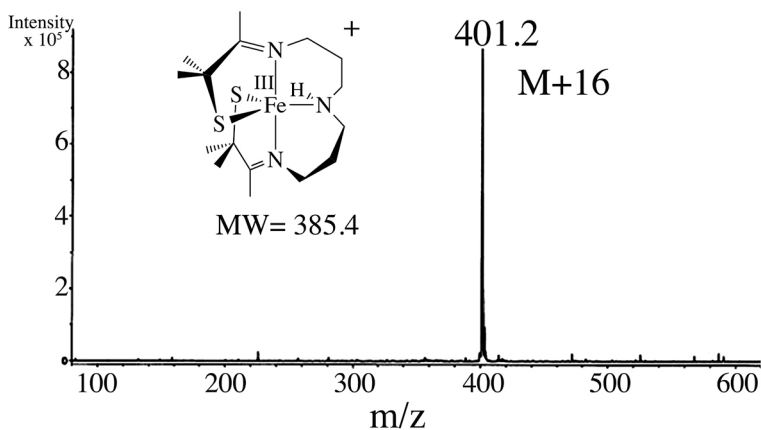

**Figure S-2.** ESI-MS of the product obtained upon addition of PhIO to **2** in MeOH, demonstrating that the m/z increases by 16, relative to the parent compound, consistent with the addition of an oxo atom.

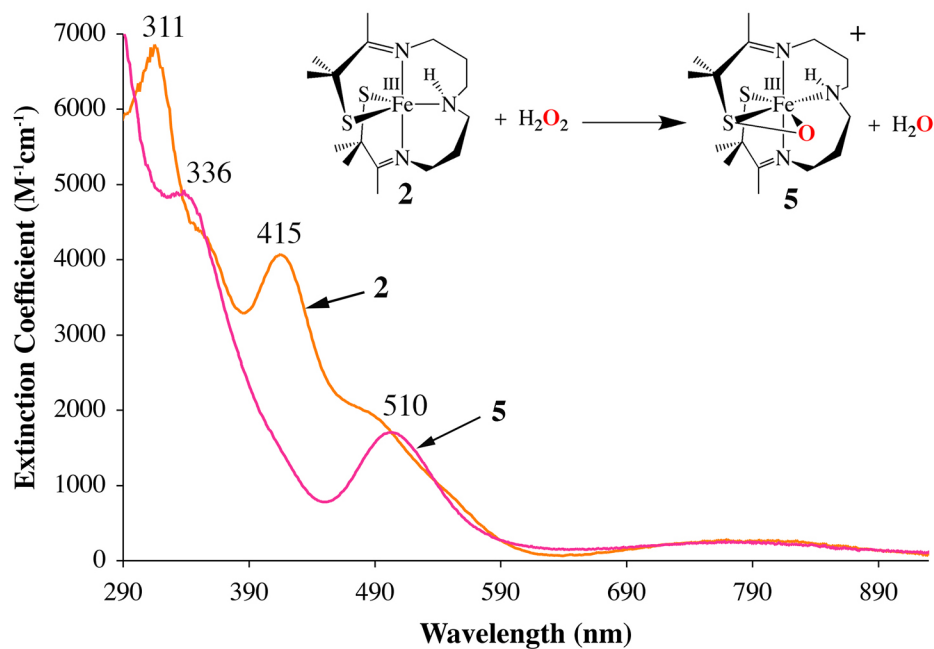

**Figure S-3.** Electronic absorption spectrum of  $[\text{Fe}^{\text{III}}(\text{S}_2^{\text{Me}_2}\text{N}_3(\text{Pr},\text{Pr}))]^+$  (**2**) and the magenta product formed upon addition of 1 equiv of  $\text{H}_2\text{O}_2$  in MeOH.

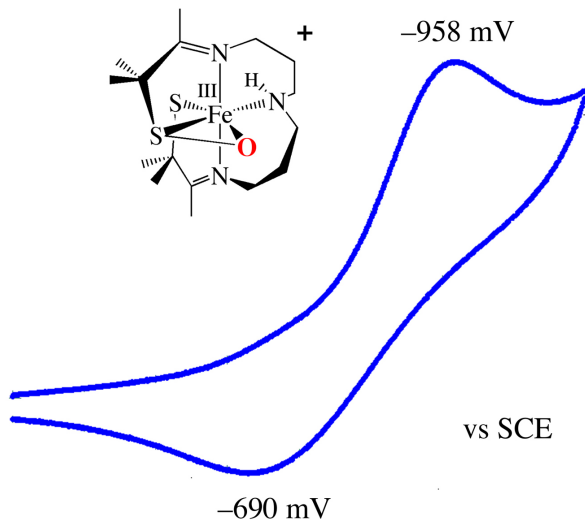

**Figure S-4.** Cyclic voltammogram of  $[\text{Fe}^{\text{III}}(\eta^2\text{-S}^{\text{Me}_2}\text{O})(\text{S}^{\text{Me}_2})\text{N}_3(\text{Pr},\text{Pr})]^+$  (**5**) in MeCN at 298 K (0.1 M  $(\text{Bu}_4\text{N})\text{PF}_6$ , glassy carbon electrode, 150 mV/sec scan rate). Peak potentials versus SCE indicated.



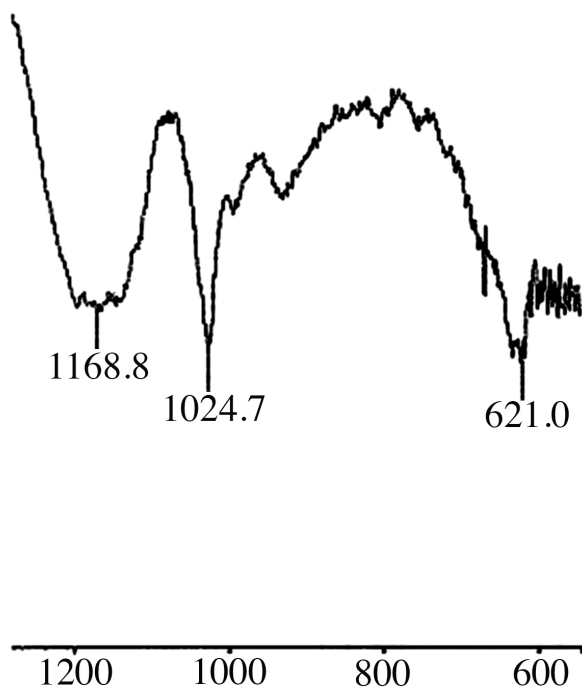

**Figure S-5.** IR spectrum of  $[\text{Fe}^{\text{III}}(\eta^2\text{-S}^{\text{Me}_2}\text{O})(\text{S}^{\text{Me}_2}\text{N}_3(\text{Pr},\text{Pr}))](\text{Cl})$  (**5**) (KBr pellet).

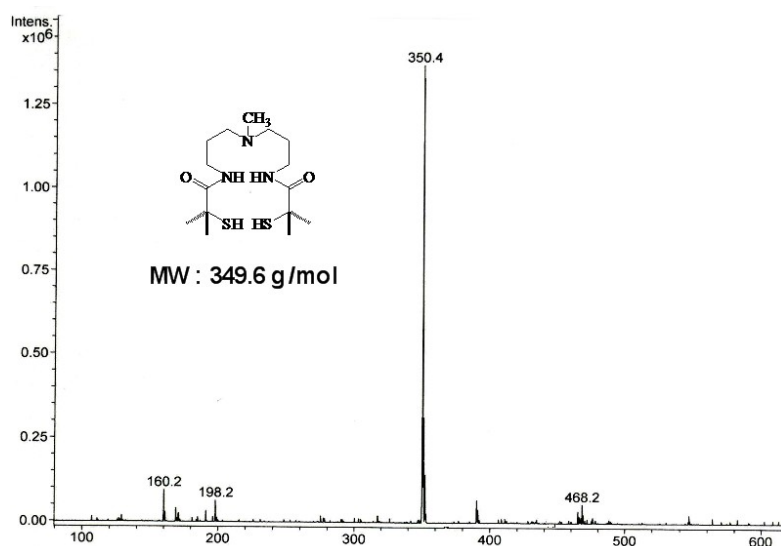

**Figure S-6.** ESI mass spec of  $(\text{Pr},\text{Pr})$  amide- $(\text{S}^{\text{Me}}\text{H})_2(\text{N}^{\text{Me}})(\text{N}^{\text{amide}}\text{H})_2$  (**C**) ligand.

Solvent: CDCl<sub>3</sub>

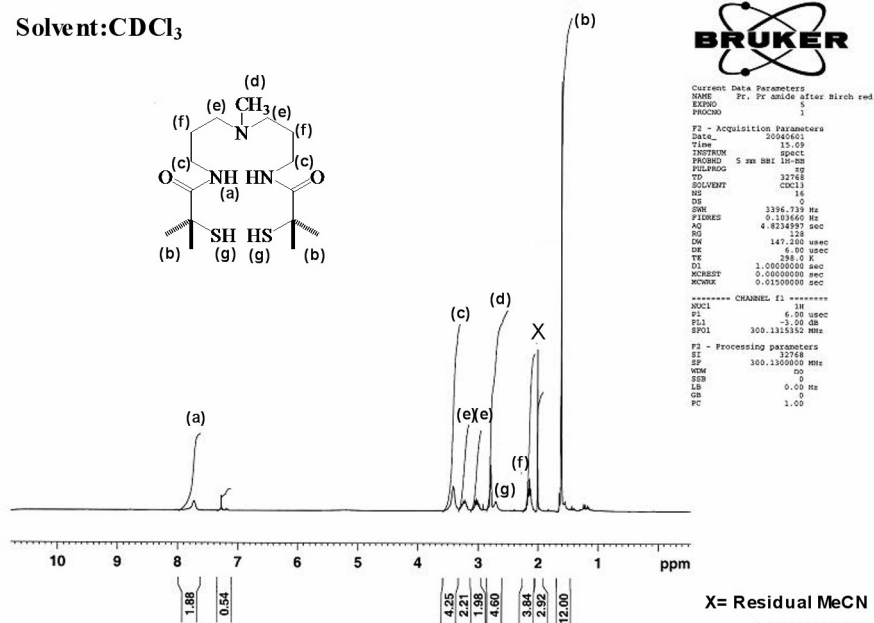

Figure S-7. <sup>1</sup>H NMR of (Pr,Pr) amide-(S<sup>Me</sup>H)<sub>2</sub>(N<sup>Me</sup>)(N<sup>amide</sup>H)<sub>2</sub> (C) in CDCl<sub>3</sub>.

Solvent: D<sub>2</sub>O

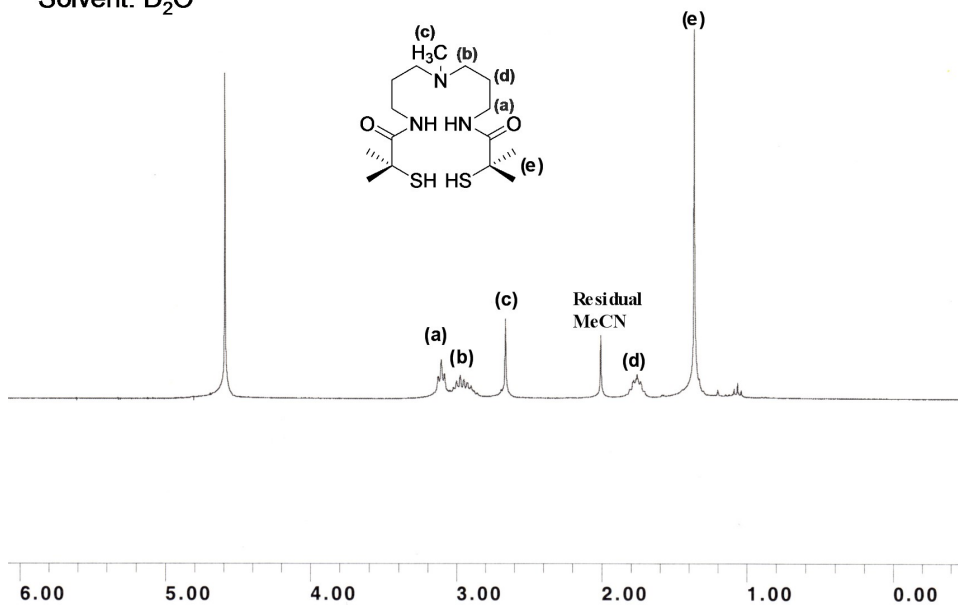

Figure S-8. <sup>1</sup>H NMR of (Pr,Pr) amide-(S<sup>Me</sup>H)<sub>2</sub>(N<sup>Me</sup>)(N<sup>amide</sup>H)<sub>2</sub> (C) in D<sub>2</sub>O.

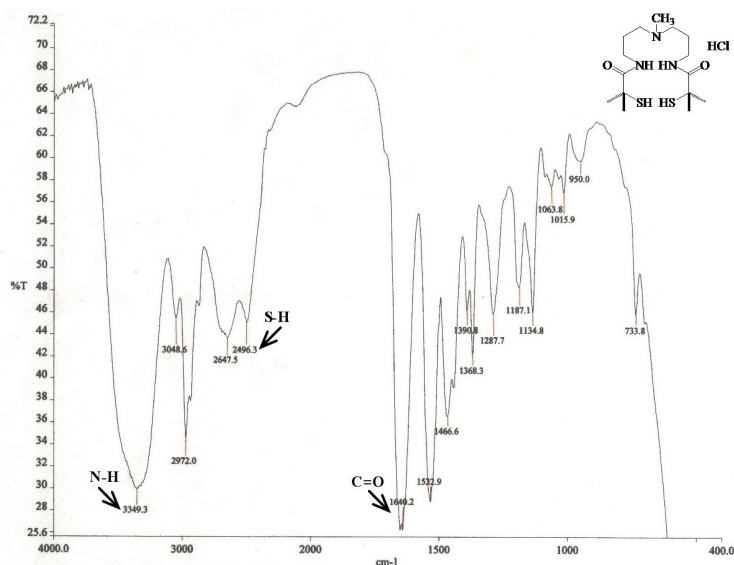

**Figure S-9.** IR spectrum of (Pr,Pr) amide-(S<sup>Me</sup>H)<sub>2</sub>(N<sup>Me</sup>)(N<sup>amide</sup>H)<sub>2</sub>(C) ligand, showing the  $\nu_{\text{SH}}$  stretch at 2496 cm<sup>-1</sup>.

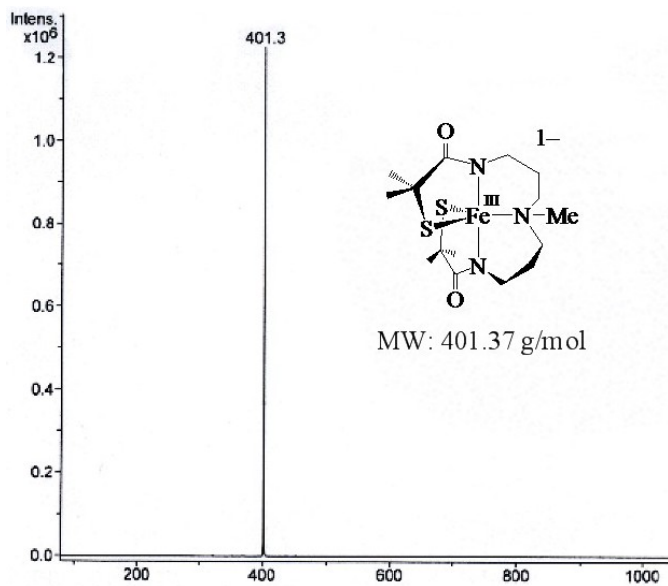

**Figure S-10.** ESI mass spec of (Et<sub>4</sub>N)[Fe<sup>III</sup>S<sub>2</sub>Me<sub>2</sub>N<sup>Me</sup>N<sub>2</sub><sup>amide</sup>(Pr,Pr)] (**8**).

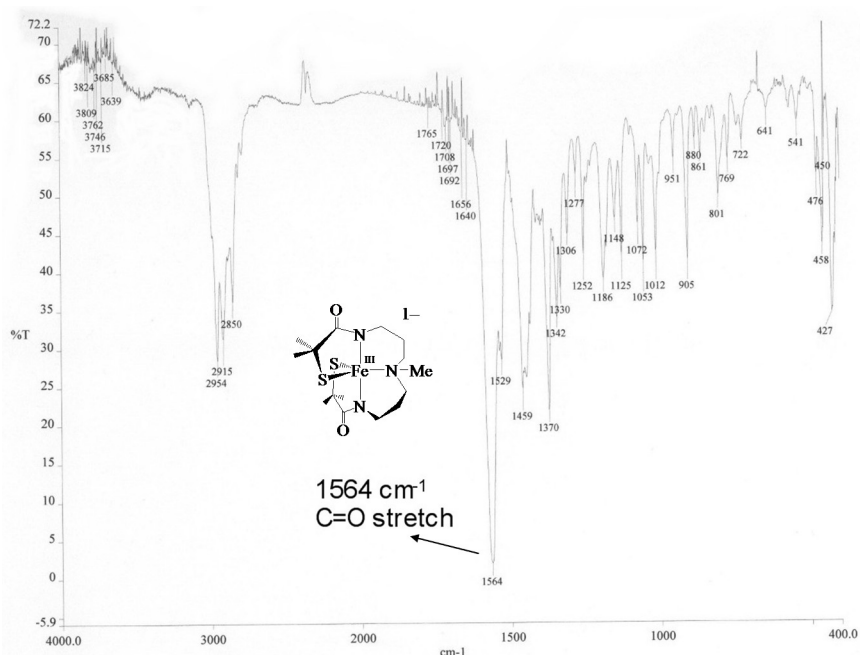

Figure S-11. IR spectrum of  $(\text{Et}_4\text{N})[\text{Fe}^{\text{III}}\text{S}_2\text{Me}_2\text{N}^{\text{Me}}\text{N}_2^{\text{amide}}(\text{Pr},\text{Pr})]$  (**8**) (KBr pellet).

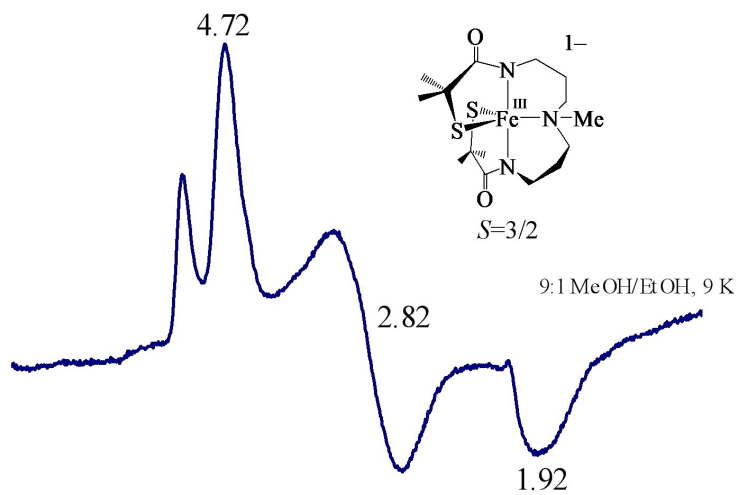

Figure S-12. X-band EPR spectrum of  $(\text{Et}_4\text{N})[\text{Fe}^{\text{III}}\text{S}_2\text{Me}_2\text{N}^{\text{Me}}\text{N}_2^{\text{amide}}(\text{Pr},\text{Pr})]$  (**8**) in MeOH/EtOH glass at 7 K.

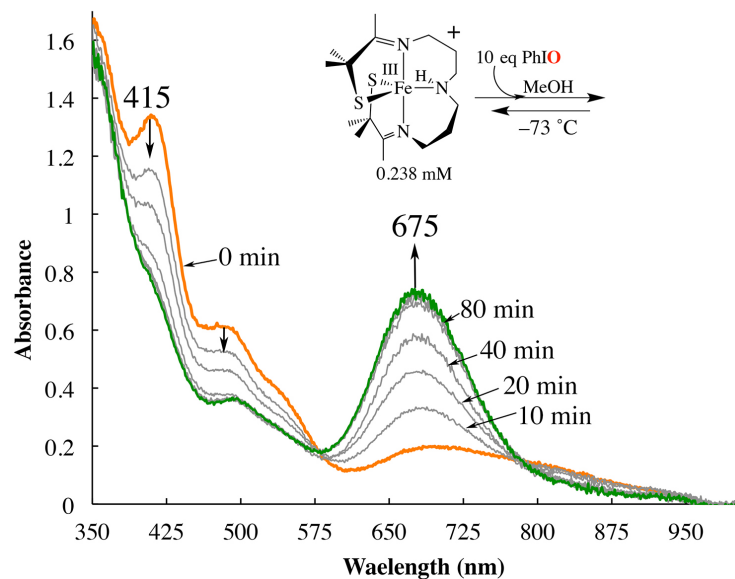

**Figure S-13.** Monitoring the formation of a green intermediate via the addition of 10 equiv of iodosylbenzene (PhIO) to  $[\text{Fe}^{\text{III}}(\text{S}_2^{\text{Me}_2}\text{N}_3(\text{Pr},\text{Pr}))]^+$  (**2**) in MeOH at  $-73\text{ }^\circ\text{C}$ .

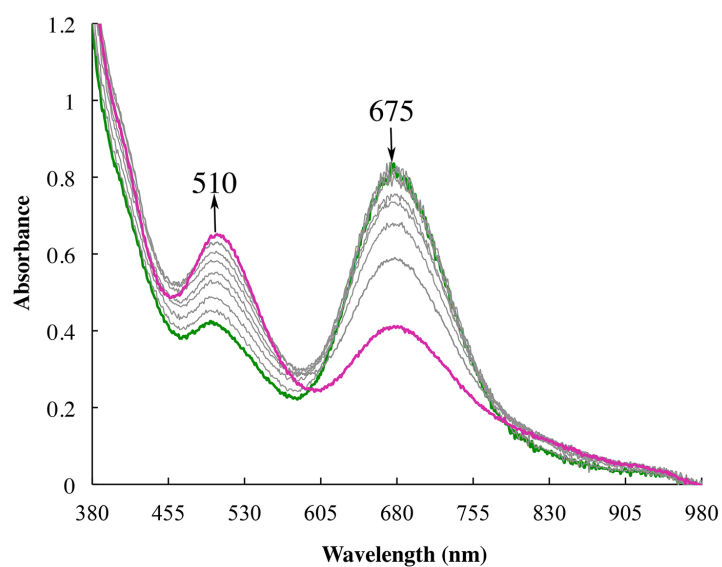

**Figure S-14.** Monitoring the conversion of the intermediate formed in the reaction between 10 equiv of iodosylbenzene (PhIO) and five-coordinate  $[\text{Fe}^{\text{III}}(\text{S}_2^{\text{Me}_2}\text{N}_3(\text{Pr},\text{Pr}))]^+$  (**2**) (MeOH at  $-73\text{ }^\circ\text{C}$ ) to sulfenate-ligated **5**.

### Supplemental Tables.

**Table S-1.** Metrical Parameters for DFT-Optimized versus Crystallographically-Determined Structures **2** and **8**.

| $[\text{Fe}^{\text{III}}(\text{S}_2^{\text{Me}_2}\text{N}_3(\text{Pr}, \text{Pr}))]^+ \text{ (2)}$                                     |                           |                           |              |             |                                |                                |
|----------------------------------------------------------------------------------------------------------------------------------------|---------------------------|---------------------------|--------------|-------------|--------------------------------|--------------------------------|
|                                                                                                                                        | Bond Length (Å)<br>(Exp.) | Bond Length (Å)<br>(Opt.) | % Difference | Bond Angles | Bond Angles<br>(degrees, Exp.) | Bond Angles<br>(degrees, Opt.) |
| Fe-S1                                                                                                                                  | 2.161                     | 2.119                     | 1.96         | S1-Fe-S2    | 121                            | 116.9                          |
| Fe-S2                                                                                                                                  | 2.133                     | 2.105                     | 1.32         | S1-Fe-N2    | 106.5                          | 103.5                          |
| Fe-N1                                                                                                                                  | 1.954                     | 1.935                     | 0.98         | N1-Fe-N2    | 86.2                           | 87.4                           |
| Fe-N2                                                                                                                                  | 2.048                     | 2.024                     | 1.18         | N1-Fe-N3    | 178.1                          | 177.3                          |
| Fe-N3                                                                                                                                  | 1.967                     | 1.951                     | 0.82         |             |                                |                                |
| $[\text{Fe}^{\text{III}}\text{S}_2^{\text{Me}_2}\text{N}^{\text{Me}}\text{N}_2^{\text{amide}}(\text{Pr}, \text{Pr})]^{1-} \text{ (8)}$ |                           |                           |              |             |                                |                                |
|                                                                                                                                        | Bond Length (Å)<br>(Exp.) | Bond Length (Å)<br>(Opt.) | % Difference | Bond Angles | Bond Angles<br>(degrees, Exp.) | Bond Angles<br>(degrees, Opt.) |
| Fe-S1                                                                                                                                  | 2.230                     | 2.201                     | 1.31         | S1-Fe-S2    | 144.4                          | 140.6                          |
| Fe-S2                                                                                                                                  | 2.210                     | 2.207                     | 0.14         | S1-Fe-N2    | 107.1                          | 111.2                          |
| Fe-N1                                                                                                                                  | 1.934                     | 1.920                     | 0.73         | N2-Fe-N3    | 89.0                           | 88.6                           |
| Fe-N2                                                                                                                                  | 2.212                     | 2.240                     | 1.26         | S1-Fe-N3    | 96.1                           | 94.1                           |
| Fe-N3                                                                                                                                  | 1.924                     | 1.917                     | 0.36         | N1-Fe-N3    | 177.8                          | 176.8                          |

**Table S-2.** Crystal data and structure refinement for  
 $[\text{Fe}^{\text{III}}(\eta^2\text{-S}^{\text{Me}_2}\text{O})(\text{S}^{\text{Me}_2}\text{N}_3(\text{Pr},\text{Pr}))](\text{PF}_6)$  (**5**).

|                                                                                               |                                                                                                                       |
|-----------------------------------------------------------------------------------------------|-----------------------------------------------------------------------------------------------------------------------|
| Empirical formula                                                                             | C16 H31 F6 Fe N3 O P S2                                                                                               |
| Formula weight                                                                                | 546.38                                                                                                                |
| Temperature                                                                                   | 130(2) K                                                                                                              |
| Wavelength                                                                                    | 0.71073 Å                                                                                                             |
| Crystal description/color                                                                     | plate / red                                                                                                           |
| Crystal system, space group                                                                   | Monoclinic, P 21/c                                                                                                    |
| Unit cell dimensions                                                                          | a = 12.3550(5)Å $\alpha$ = 90 deg.<br>b = 15.3070(8)Å $\beta$ = 123.147(3) deg.<br>c = 14.8020(7)Å $\gamma$ = 90 deg. |
| Volume                                                                                        | 2343.79(19) Å <sup>3</sup>                                                                                            |
| Z, Calculated density                                                                         | 4, 1.548 Mg/m <sup>3</sup>                                                                                            |
| Absorption coefficient                                                                        | 0.950 mm <sup>-1</sup>                                                                                                |
| F(000)                                                                                        | 1132                                                                                                                  |
| Crystal size                                                                                  | 0.24 x 0.24 x 0.05 mm                                                                                                 |
| Reflections for indexing                                                                      | 306                                                                                                                   |
| Theta range for data collection                                                               | 3.06 to 28.34 deg.                                                                                                    |
| Index ranges                                                                                  | -16<=h<=16, -18<=k<=20, -19<=l<=19                                                                                    |
| Reflections collected /                                                                       | unique 9378/5215 [R(int)= 0.0698]                                                                                     |
| Completeness to                                                                               | theta = 25.00 96.1%                                                                                                   |
| Absorption correction                                                                         | Semi-empirical from equivalents                                                                                       |
| Max. and min. transmission                                                                    | 0.9540 and 0.8040                                                                                                     |
| Refinement method                                                                             | Full-matrix least-squares on F <sup>2</sup>                                                                           |
| Data/restraints/parameters                                                                    | 5215/1/271                                                                                                            |
| Goodness-of-fit on F <sup>2</sup>                                                             | S = 1.001                                                                                                             |
| S = root(sum(w*D*D)/(n-p)), where D = (Fo*Fo - Fc*Fc)                                         |                                                                                                                       |
| Final R indices [I>2sigma(I)]                                                                 | *R1 = 0.0721, wR2 = 0.1759                                                                                            |
| R indices (all data)                                                                          | R1 = 0.1459, *wR2 = 0.2040                                                                                            |
| *Report these R factors.                                                                      |                                                                                                                       |
| R1 = sum  Fo - Fc  /sum Fo , wR2= root(sum(w*D*D)/sum(w*Fo*Fo)),<br>where D = (Fo*Fo - Fc*Fc) |                                                                                                                       |
| Weighting scheme                                                                              |                                                                                                                       |
| calc w=1/[\s^2^(Fo^2^)+(0.1019P)^2^+0.0000P] where<br>P=(Fo^2^+2Fc^2^)/3                      |                                                                                                                       |
| Largest diff. peak and hole                                                                   | 0.816 and -0.785 e.Å <sup>-3</sup>                                                                                    |

**Table S-3.** Atomic coordinates ( $\times 10^4$ ) and equivalent isotropic displacement parameters ( $\text{\AA}^2 \times 10^3$ ) for  $[\text{Fe}^{\text{III}}(\eta^2\text{-S}^{\text{Me}_2}\text{O})(\text{S}^{\text{Me}_2}\text{N}_3(\text{Pr},\text{Pr}))(\text{PF}_6)]$  (**5**).  $U(\text{eq})$  is defined as one third of the trace of the orthogonalized  $U_{ij}$  tensor.

|       | x        | y       | z       | U(eq) |
|-------|----------|---------|---------|-------|
| Fe(1) | 4979(1)  | 3460(1) | 2934(1) | 45(1) |
| S(1)  | 3757(1)  | 3102(1) | 1268(1) | 65(1) |
| S(2)  | 5442(1)  | 4828(1) | 3152(1) | 58(1) |
| P(1)  | 9348(1)  | 1373(1) | 1921(1) | 50(1) |
| F(1)  | 9504(4)  | 1476(2) | 925(3)  | 69(1) |
| F(2)  | 9176(3)  | 1268(2) | 2910(3) | 65(1) |
| F(3)  | 10002(4) | 427(2)  | 2187(3) | 73(1) |
| F(4)  | 7950(3)  | 955(2)  | 1137(3) | 67(1) |
| F(5)  | 8695(3)  | 2322(2) | 1653(3) | 60(1) |
| F(6)  | 10730(3) | 1803(3) | 2693(3) | 79(1) |
| O(1)  | 4081(4)  | 2346(3) | 1958(4) | 88(2) |
| N(1)  | 3364(4)  | 3663(3) | 2878(4) | 54(1) |
| N(2)  | 5887(5)  | 2775(3) | 4349(4) | 58(1) |
| N(3)  | 6600(4)  | 3297(3) | 3018(3) | 43(1) |
| C(1)  | 2207(5)  | 3506(4) | 935(5)  | 55(2) |
| C(2)  | 1979(6)  | 4348(4) | 295(6)  | 86(2) |
| C(3)  | 1160(5)  | 2823(4) | 222(5)  | 59(2) |
| C(4)  | 2252(5)  | 3697(4) | 1942(5) | 55(2) |
| C(5)  | 1000(5)  | 3892(4) | 1849(6) | 73(2) |
| C(6)  | 3350(6)  | 3835(5) | 3850(6) | 73(2) |
| C(7)  | 4648(7)  | 3609(4) | 4895(6) | 71(2) |
| C(8)  | 5160(6)  | 2716(4) | 4873(5) | 65(2) |
| C(9)  | 6388(5)  | 1908(4) | 4315(5) | 60(2) |
| C(10) | 7435(5)  | 1960(4) | 4064(5) | 60(2) |
| C(11) | 6988(5)  | 2381(4) | 3009(5) | 52(1) |
| C(12) | 7353(4)  | 3937(3) | 3137(4) | 39(1) |
| C(13) | 8655(4)  | 3817(4) | 3302(4) | 46(1) |
| C(14) | 6920(4)  | 4854(3) | 3127(4) | 44(1) |
| C(15) | 7966(5)  | 5369(4) | 4159(5) | 57(2) |
| C(16) | 6616(6)  | 5315(4) | 2099(5) | 66(2) |



**Table S-4.** Bond lengths [Å] and angles [deg] for  $[\text{Fe}^{\text{III}}(\eta^2\text{-S}^{\text{Me}_2}\text{O})(\text{S}^{\text{Me}_2}\text{N}_3(\text{Pr},\text{Pr}))(\text{PF}_6)]$  (**5**).

---

|            |            |
|------------|------------|
| Fe(1)-N(3) | 1.954(4)   |
| Fe(1)-N(1) | 1.976(4)   |
| Fe(1)-N(2) | 2.044(5)   |
| Fe(1)-O(1) | 2.115(4)   |
| Fe(1)-S(1) | 2.1420(17) |
| Fe(1)-S(2) | 2.1477(17) |
| S(1)-O(1)  | 1.447(6)   |
| S(1)-C(1)  | 1.806(5)   |
| S(2)-C(14) | 1.847(4)   |
| P(1)-F(4)  | 1.596(4)   |
| P(1)-F(6)  | 1.587(4)   |
| P(1)-F(1)  | 1.596(3)   |
| P(1)-F(2)  | 1.599(3)   |
| P(1)-F(3)  | 1.599(4)   |
| P(1)-F(5)  | 1.603(3)   |
| N(1)-C(4)  | 1.314(7)   |
| N(1)-C(6)  | 1.472(7)   |
| N(2)-C(8)  | 1.475(6)   |
| N(2)-C(9)  | 1.477(7)   |
| N(2)-H(2)  | 0.9301     |
| N(3)-C(12) | 1.295(6)   |
| N(3)-C(11) | 1.484(7)   |
| C(1)-C(4)  | 1.489(8)   |
| C(1)-C(2)  | 1.532(8)   |
| C(1)-C(3)  | 1.544(8)   |
| C(2)-H(2A) | 0.9799     |
| C(2)-H(2B) | 0.9800     |
| C(2)-H(2C) | 0.9800     |
| C(3)-H(3A) | 0.9801     |
| C(3)-H(3B) | 0.9799     |
| C(3)-H(3C) | 0.9800     |
| C(4)-C(5)  | 1.507(7)   |
| C(5)-H(5A) | 0.9800     |
| C(5)-H(5B) | 0.9800     |
| C(5)-H(5C) | 0.9800     |
| C(6)-C(7)  | 1.540(10)  |
| C(6)-H(6A) | 0.9899     |
| C(6)-H(6B) | 0.9900     |
| C(7)-C(8)  | 1.514(9)   |
| C(7)-H(7A) | 0.9901     |
| C(7)-H(7B) | 0.9899     |
| C(8)-H(8A) | 0.9900     |
| C(8)-H(8B) | 0.9900     |
| C(9)-C(10) | 1.531(7)   |

|                  |            |
|------------------|------------|
| C(9)-H(9A)       | 0.9901     |
| C(9)-H(9B)       | 0.9901     |
| C(10)-C(11)      | 1.489(8)   |
| C(10)-H(10A)     | 0.9900     |
| C(10)-H(10B)     | 0.9900     |
| C(11)-H(11A)     | 0.9900     |
| C(11)-H(11B)     | 0.9900     |
| C(12)-C(14)      | 1.499(7)   |
| C(12)-C(13)      | 1.501(6)   |
| C(13)-H(13A)     | 0.9799     |
| C(13)-H(13B)     | 0.9801     |
| C(13)-H(13C)     | 0.9800     |
| C(14)-C(16)      | 1.526(8)   |
| C(14)-C(15)      | 1.570(7)   |
| C(15)-H(15A)     | 0.9800     |
| C(15)-H(15B)     | 0.9800     |
| C(15)-H(15C)     | 0.9800     |
| C(16)-H(16A)     | 0.9800     |
| C(16)-H(16B)     | 0.9799     |
| C(16)-H(16C)     | 0.9800     |
| N(3)-Fe(1)-N(1)  | 178.00(19) |
| N(3)-Fe(1)-N(2)  | 84.29(17)  |
| N(1)-Fe(1)-N(2)  | 95.7(2)    |
| N(3)-Fe(1)-O(1)  | 94.44(17)  |
| N(1)-Fe(1)-O(1)  | 87.56(18)  |
| N(2)-Fe(1)-O(1)  | 94.3(2)    |
| N(3)-Fe(1)-S(1)  | 95.37(13)  |
| N(1)-Fe(1)-S(1)  | 86.08(15)  |
| N(2)-Fe(1)-S(1)  | 134.02(15) |
| O(1)-Fe(1)-S(1)  | 39.72(16)  |
| N(3)-Fe(1)-S(2)  | 86.28(13)  |
| N(1)-Fe(1)-S(2)  | 91.89(14)  |
| N(2)-Fe(1)-S(2)  | 113.24(15) |
| O(1)-Fe(1)-S(2)  | 152.32(17) |
| S(1)-Fe(1)-S(2)  | 112.62(8)  |
| O(1)-S(1)-C(1)   | 108.0(3)   |
| O(1)-S(1)-Fe(1)  | 69.14(19)  |
| C(1)-S(1)-Fe(1)  | 101.6(2)   |
| C(14)-S(2)-Fe(1) | 101.76(17) |
| F(4)-P(1)-F(6)   | 179.2(2)   |
| F(4)-P(1)-F(1)   | 89.8(2)    |
| F(6)-P(1)-F(1)   | 89.9(2)    |
| F(4)-P(1)-F(2)   | 89.56(18)  |
| F(6)-P(1)-F(2)   | 90.7(2)    |
| F(1)-P(1)-F(2)   | 179.4(2)   |
| F(4)-P(1)-F(3)   | 90.9(2)    |
| F(6)-P(1)-F(3)   | 89.9(2)    |
| F(1)-P(1)-F(3)   | 91.01(17)  |

|                  |           |
|------------------|-----------|
| F(2)-P(1)-F(3)   | 89.16(18) |
| F(4)-P(1)-F(5)   | 89.17(18) |
| F(6)-P(1)-F(5)   | 90.0(2)   |
| F(1)-P(1)-F(5)   | 88.89(18) |
| F(2)-P(1)-F(5)   | 90.94(17) |
| F(3)-P(1)-F(5)   | 179.9(2)  |
| S(1)-O(1)-Fe(1)  | 71.1(2)   |
| C(4)-N(1)-C(6)   | 117.4(4)  |
| C(4)-N(1)-Fe(1)  | 120.0(4)  |
| C(6)-N(1)-Fe(1)  | 122.6(4)  |
| C(8)-N(2)-C(9)   | 110.5(4)  |
| C(8)-N(2)-Fe(1)  | 114.8(4)  |
| C(9)-N(2)-Fe(1)  | 115.5(3)  |
| C(8)-N(2)-H(2)   | 104.9     |
| C(9)-N(2)-H(2)   | 104.9     |
| Fe(1)-N(2)-H(2)  | 104.9     |
| C(12)-N(3)-C(11) | 120.4(4)  |
| C(12)-N(3)-Fe(1) | 123.1(3)  |
| C(11)-N(3)-Fe(1) | 116.4(3)  |
| C(4)-C(1)-C(2)   | 110.3(5)  |
| C(4)-C(1)-C(3)   | 112.1(5)  |
| C(2)-C(1)-C(3)   | 110.2(5)  |
| C(4)-C(1)-S(1)   | 109.8(4)  |
| C(2)-C(1)-S(1)   | 105.4(4)  |
| C(3)-C(1)-S(1)   | 108.8(4)  |
| C(1)-C(2)-H(2A)  | 109.5     |
| C(1)-C(2)-H(2B)  | 109.4     |
| H(2A)-C(2)-H(2B) | 109.5     |
| C(1)-C(2)-H(2C)  | 109.5     |
| H(2A)-C(2)-H(2C) | 109.5     |
| H(2B)-C(2)-H(2C) | 109.5     |
| C(1)-C(3)-H(3A)  | 109.5     |
| C(1)-C(3)-H(3B)  | 109.5     |
| H(3A)-C(3)-H(3B) | 109.5     |
| C(1)-C(3)-H(3C)  | 109.5     |
| H(3A)-C(3)-H(3C) | 109.5     |
| H(3B)-C(3)-H(3C) | 109.5     |
| N(1)-C(4)-C(1)   | 119.6(4)  |
| N(1)-C(4)-C(5)   | 122.2(6)  |
| C(1)-C(4)-C(5)   | 118.2(5)  |
| C(4)-C(5)-H(5A)  | 109.5     |
| C(4)-C(5)-H(5B)  | 109.5     |
| H(5A)-C(5)-H(5B) | 109.5     |
| C(4)-C(5)-H(5C)  | 109.5     |
| H(5A)-C(5)-H(5C) | 109.5     |
| H(5B)-C(5)-H(5C) | 109.5     |
| N(1)-C(6)-C(7)   | 112.3(5)  |
| N(1)-C(6)-H(6A)  | 109.1     |

|                     |          |
|---------------------|----------|
| C(7)-C(6)-H(6A)     | 109.2    |
| N(1)-C(6)-H(6B)     | 109.1    |
| C(7)-C(6)-H(6B)     | 109.2    |
| H(6A)-C(6)-H(6B)    | 107.9    |
| C(6)-C(7)-C(8)      | 113.6(6) |
| C(6)-C(7)-H(7A)     | 108.8    |
| C(8)-C(7)-H(7A)     | 108.9    |
| C(6)-C(7)-H(7B)     | 108.9    |
| C(8)-C(7)-H(7B)     | 108.9    |
| H(7A)-C(7)-H(7B)    | 107.7    |
| N(2)-C(8)-C(7)      | 109.7(5) |
| N(2)-C(8)-H(8A)     | 109.7    |
| C(7)-C(8)-H(8A)     | 109.7    |
| N(2)-C(8)-H(8B)     | 109.7    |
| C(7)-C(8)-H(8B)     | 109.7    |
| H(8A)-C(8)-H(8B)    | 108.2    |
| N(2)-C(9)-C(10)     | 112.8(4) |
| N(2)-C(9)-H(9A)     | 109.0    |
| C(10)-C(9)-H(9A)    | 109.1    |
| N(2)-C(9)-H(9B)     | 109.0    |
| C(10)-C(9)-H(9B)    | 109.0    |
| H(9A)-C(9)-H(9B)    | 107.8    |
| C(9)-C(10)-C(11)    | 113.5(5) |
| C(9)-C(10)-H(10A)   | 108.8    |
| C(11)-C(10)-H(10A)  | 108.9    |
| C(9)-C(10)-H(10B)   | 108.9    |
| C(11)-C(10)-H(10B)  | 108.9    |
| H(10A)-C(10)-H(10B) | 107.7    |
| N(3)-C(11)-C(10)    | 109.7(4) |
| N(3)-C(11)-H(11A)   | 109.8    |
| C(10)-C(11)-H(11A)  | 109.7    |
| N(3)-C(11)-H(11B)   | 109.7    |
| C(10)-C(11)-H(11B)  | 109.8    |
| H(11A)-C(11)-H(11B) | 108.2    |
| N(3)-C(12)-C(14)    | 118.8(4) |
| N(3)-C(12)-C(13)    | 123.7(5) |
| C(14)-C(12)-C(13)   | 117.4(4) |
| C(12)-C(13)-H(13A)  | 109.5    |
| C(12)-C(13)-H(13B)  | 109.5    |
| H(13A)-C(13)-H(13B) | 109.5    |
| C(12)-C(13)-H(13C)  | 109.4    |
| H(13A)-C(13)-H(13C) | 109.5    |
| H(13B)-C(13)-H(13C) | 109.5    |
| C(12)-C(14)-C(16)   | 109.6(4) |
| C(12)-C(14)-C(15)   | 111.1(4) |
| C(16)-C(14)-C(15)   | 111.2(5) |
| C(12)-C(14)-S(2)    | 109.3(3) |
| C(16)-C(14)-S(2)    | 108.8(4) |

|                     |          |
|---------------------|----------|
| C(15)-C(14)-S(2)    | 106.7(3) |
| C(14)-C(15)-H(15A)  | 109.5    |
| C(14)-C(15)-H(15B)  | 109.5    |
| H(15A)-C(15)-H(15B) | 109.5    |
| C(14)-C(15)-H(15C)  | 109.4    |
| H(15A)-C(15)-H(15C) | 109.5    |
| H(15B)-C(15)-H(15C) | 109.5    |
| C(14)-C(16)-H(16A)  | 109.4    |
| C(14)-C(16)-H(16B)  | 109.5    |
| H(16A)-C(16)-H(16B) | 109.5    |
| C(14)-C(16)-H(16C)  | 109.5    |
| H(16A)-C(16)-H(16C) | 109.5    |
| H(16B)-C(16)-H(16C) | 109.5    |

---

Symmetry transformations used to generate equivalent atoms:

**Table S-5.** Anisotropic displacement parameters ( $\text{Å}^2 \times 10^3$ ) for  $[\text{Fe}^{\text{III}}(\eta^2\text{-S}^{\text{Me}2}\text{O})(\text{S}^{\text{Me}2}\text{N}_3(\text{Pr},\text{Pr}))(\text{PF}_6)]$  (**5**). The anisotropic displacement factor exponent takes the form:  $-2 \pi^2 [h^2 a^{*2} U_{11} + \dots + 2 h k a^* b^* U_{12}]$

|       | U11   | U22   | U33    | U23    | U13   | U12    |
|-------|-------|-------|--------|--------|-------|--------|
| Fe(1) | 35(1) | 47(1) | 58(1)  | -5(1)  | 29(1) | -5(1)  |
| S(1)  | 40(1) | 89(1) | 67(1)  | -13(1) | 30(1) | -3(1)  |
| S(2)  | 43(1) | 50(1) | 92(1)  | -11(1) | 44(1) | 0(1)   |
| P(1)  | 51(1) | 47(1) | 63(1)  | 1(1)   | 38(1) | 6(1)   |
| F(1)  | 97(3) | 60(2) | 83(2)  | 8(2)   | 70(2) | 13(2)  |
| F(2)  | 65(2) | 72(2) | 69(2)  | 3(2)   | 44(2) | 12(2)  |
| F(3)  | 96(3) | 51(2) | 107(3) | 16(2)  | 78(2) | 22(2)  |
| F(4)  | 66(2) | 64(2) | 75(2)  | -11(2) | 41(2) | -12(2) |
| F(5)  | 73(2) | 42(2) | 72(2)  | 0(2)   | 45(2) | 10(2)  |
| F(6)  | 56(2) | 78(3) | 93(3)  | 7(2)   | 36(2) | -6(2)  |
| O(1)  | 82(3) | 67(3) | 117(4) | -35(2) | 56(3) | -24(2) |
| N(1)  | 49(3) | 48(3) | 87(4)  | -19(2) | 51(3) | -10(2) |
| N(2)  | 70(3) | 49(3) | 74(3)  | -10(2) | 52(3) | -7(2)  |
| N(3)  | 38(2) | 40(3) | 53(3)  | 2(2)   | 27(2) | 6(2)   |
| C(1)  | 39(3) | 43(3) | 75(4)  | 6(3)   | 27(3) | 2(2)   |
| C(2)  | 61(4) | 55(4) | 115(6) | 27(4)  | 31(4) | -6(3)  |
| C(3)  | 40(3) | 39(3) | 84(4)  | 1(3)   | 25(3) | -2(2)  |
| C(4)  | 38(3) | 36(3) | 100(5) | -8(3)  | 43(3) | -5(2)  |
| C(5)  | 49(3) | 57(4) | 117(6) | -12(4) | 49(4) | 1(3)   |
| C(6)  | 58(4) | 85(5) | 97(5)  | -28(4) | 55(4) | -15(3) |
| C(7)  | 89(5) | 70(5) | 88(5)  | -24(4) | 70(4) | -19(4) |
| C(8)  | 69(4) | 68(4) | 73(4)  | -4(3)  | 48(3) | -16(3) |
| C(9)  | 58(3) | 42(3) | 75(4)  | 4(3)   | 34(3) | -8(3)  |
| C(10) | 55(3) | 38(3) | 95(5)  | -3(3)  | 45(3) | 2(3)   |
| C(11) | 45(3) | 44(3) | 72(4)  | 0(3)   | 36(3) | -1(2)  |
| C(12) | 36(3) | 43(3) | 38(3)  | 2(2)   | 20(2) | 0(2)   |
| C(13) | 34(3) | 42(3) | 64(3)  | -5(3)  | 28(2) | -3(2)  |
| C(14) | 34(3) | 45(3) | 58(3)  | 1(2)   | 29(2) | 1(2)   |
| C(15) | 51(3) | 38(3) | 88(4)  | -8(3)  | 42(3) | -7(3)  |
| C(16) | 54(3) | 65(4) | 81(4)  | 33(3)  | 38(3) | 22(3)  |

**Table S-6.** Hydrogen coordinates ( $\times 10^4$ ) and isotropic Displacement parameters ( $\text{\AA}^2 \times 10^3$ ) for  $[\text{Fe}^{\text{III}}(\eta^2\text{-S}^{\text{Me}_2}\text{O})(\text{S}^{\text{Me}_2}\text{N}_3(\text{Pr},\text{Pr}))(\text{PF}_6)]$  (**5**).

|        | x    | y    | z    | U(eq) |
|--------|------|------|------|-------|
| H(2)   | 6617 | 3102 | 4822 | 69    |
| H(2A)  | 2637 | 4781 | 760  | 104   |
| H(2B)  | 2034 | 4223 | -327 | 104   |
| H(2C)  | 1119 | 4580 | 45   | 104   |
| H(3A)  | 301  | 3080 | -81  | 71    |
| H(3B)  | 1256 | 2644 | -366 | 71    |
| H(3C)  | 1257 | 2313 | 660  | 71    |
| H(5A)  | 1099 | 4423 | 2257 | 87    |
| H(5B)  | 313  | 3978 | 1089 | 87    |
| H(5C)  | 774  | 3401 | 2141 | 87    |
| H(6A)  | 3155 | 4460 | 3865 | 88    |
| H(6B)  | 2654 | 3487 | 3816 | 88    |
| H(7A)  | 4538 | 3634 | 5508 | 85    |
| H(7B)  | 5296 | 4055 | 5020 | 85    |
| H(8A)  | 4431 | 2302 | 4470 | 78    |
| H(8B)  | 5733 | 2494 | 5618 | 78    |
| H(9A)  | 6748 | 1615 | 5020 | 72    |
| H(9B)  | 5664 | 1547 | 3758 | 72    |
| H(10A) | 7739 | 1361 | 4064 | 72    |
| H(10B) | 8180 | 2293 | 4645 | 72    |
| H(11A) | 6244 | 2053 | 2420 | 62    |
| H(11B) | 7692 | 2372 | 2878 | 62    |
| H(13A) | 8583 | 3408 | 2763 | 55    |
| H(13B) | 8972 | 4382 | 3226 | 55    |
| H(13C) | 9261 | 3584 | 4027 | 55    |
| H(15A) | 8730 | 5467 | 4130 | 69    |
| H(15B) | 7610 | 5932 | 4188 | 69    |
| H(15C) | 8211 | 5027 | 4805 | 69    |
| H(16A) | 6033 | 4950 | 1473 | 79    |
| H(16B) | 6199 | 5877 | 2034 | 79    |
| H(16C) | 7419 | 5414 | 2129 | 79    |

**Table S-7.** Crystal data and structure refinement for  
 $(Et_4N)[Fe^{III}S_2^{Me_2}N^MeN_2^{amide}(Pr,Pr)]$  (**8**).

|                                 |                                                                                                     |
|---------------------------------|-----------------------------------------------------------------------------------------------------|
| Empirical formula               | C23 H47 Fe N4 O2 S2                                                                                 |
| Formula weight                  | 531.62                                                                                              |
| Temperature                     | 130(2) K                                                                                            |
| Wavelength                      | 0.71073 Å                                                                                           |
| Crystal description/color       | prism / black                                                                                       |
| Crystal system, space group     | Orthorhombic, P n a 21                                                                              |
| Unit cell dimensions            | a = 17.9580(3)Å alpha = 90 deg.<br>b = 8.5610(6)Å beta = 90 deg.<br>c = 18.1560(7)Å gamma = 90 deg. |
| Volume                          | 2791.3(2) Å <sup>3</sup>                                                                            |
| Z, Calculated density           | 4, 1.265 Mg/m <sup>3</sup>                                                                          |
| Absorption coefficient          | 0.715 mm <sup>-1</sup>                                                                              |
| F(000)                          | 1148                                                                                                |
| Crystal size                    | 0.48 x 0.44 x 0.36 mm                                                                               |
| Reflections for indexing        | 857                                                                                                 |
| Theta range for data collection | 2.27 to 28.63 deg.                                                                                  |
| Index ranges                    | -23<=h<=23, -11<=k<=11, -23<=l<=23                                                                  |
| Reflections collected / unique  | 6353 / 6353 [R(int) = 0.063]                                                                        |
| Completeness to theta = 25.00   | 99.8%                                                                                               |
| Absorption correction           | Semi-empirical from equivalents                                                                     |
| Max. and min. transmission      | 0.7828 and 0.7252                                                                                   |
| Refinement method               | Full-matrix least-squares on F <sup>2</sup>                                                         |
| Data / restraints / parameters  | 6353 / 1 / 326                                                                                      |



Goodness-of-fit on  $F^2$   $S = 0.940$   
 $S = \text{root}(\text{sum}(w*D*D)/(n-p))$ , where  $D = (F_o*F_o - F_c*F_c)$

Final R indices [ $I > 2\sigma(I)$ ]  $*R_1 = 0.0477$ ,  $wR_2 = 0.1075$   
R indices (all data)  $R_1 = 0.0868$ ,  $*wR_2 = 0.1219$

\*Report these R factors.

$R_1 = \text{sum}(|F_o| - |F_c|) / \text{sum}|F_o|$ ,  $wR_2 = \text{root}(\text{sum}(w*D*D) / \text{sum}(w*F_o*F_o))$ ,  
where  $D = (F_o*F_o - F_c*F_c)$

Weighting scheme

calc  $w = 1 / [\sigma^2(F_o^2) + (0.0686P)^2 + 0.0000P]$  where  $P = (F_o^2 + 2F_c^2) / 3$

Largest diff. peak and hole  $0.598$  and  $-0.351 \text{ e.}\text{\AA}^{-3}$

**Table S-8.** Atomic coordinates ( $\times 10^4$ ) and equivalent isotropic displacement parameters ( $\text{\AA}^2 \times 10^3$ ) for  $(\text{Et}_4\text{N})[\text{Fe}^{\text{III}}\text{S}_2\text{N}^{\text{Me}_2}\text{N}_2^{\text{amide}}(\text{Pr},\text{Pr})]$  (**8**).  $U(\text{eq})$  is defined as one third of the trace of the orthogonalized  $U_{ij}$  tensor.

|       | x       | y        | z        | $U(\text{eq})$ |
|-------|---------|----------|----------|----------------|
| Fe(1) | 1378(1) | 743(1)   | 1648(1)  | 39(1)          |
| S(1)  | 420(1)  | -795(1)  | 1941(1)  | 44(1)          |
| S(2)  | 1820(1) | 2369(1)  | 810(1)   | 48(1)          |
| O(1)  | -135(2) | 3094(3)  | 2899(2)  | 51(1)          |
| O(2)  | 2867(2) | -1470(3) | 329(2)   | 54(1)          |
| N(2)  | 2176(2) | 637(4)   | 2574(2)  | 48(1)          |
| N(1)  | 838(2)  | 2358(3)  | 2168(2)  | 44(1)          |
| N(3)  | 1948(2) | -840(3)  | 1150(2)  | 43(1)          |
| N(4)  | 221(2)  | -4171(3) | -64(2)   | 39(1)          |
| C(1)  | -766(2) | 1095(4)  | 1590(3)  | 46(1)          |
| C(2)  | -716(2) | 79(5)    | 2877(2)  | 50(1)          |
| C(3)  | -255(2) | 679(4)   | 2237(2)  | 41(1)          |
| C(4)  | 160(2)  | 2162(4)  | 2471(2)  | 42(1)          |
| C(5)  | 1265(2) | 3735(5)  | 2403(2)  | 52(1)          |
| C(6)  | 1800(2) | 3336(6)  | 3021(3)  | 64(1)          |
| C(7)  | 2431(4) | 2214(9)  | 2756(4)  | 53(2)          |
| C(7B) | 1850(6) | 1567(16) | 3184(6)  | 60(4)          |
| C(8)  | 1837(4) | -118(10) | 3227(4)  | 57(2)          |
| C(8B) | 2901(6) | 1328(18) | 2370(7)  | 67(4)          |
| C(9)  | 2843(4) | -274(10) | 2361(4)  | 58(2)          |
| C(9B) | 2253(7) | -962(16) | 2811(7)  | 64(4)          |
| C(10) | 2667(3) | -2027(6) | 2167(3)  | 74(1)          |
| C(11) | 2093(2) | -2269(4) | 1564(3)  | 53(1)          |
| C(12) | 2396(2) | -561(4)  | 575(2)   | 44(1)          |
| C(13) | 2258(2) | 995(4)   | 170(2)   | 42(1)          |
| C(14) | 2998(2) | 1680(5)  | -92(2)   | 53(1)          |
| C(15) | 1766(2) | 707(5)   | -487(2)  | 50(1)          |
| C(16) | -473(2) | -3308(4) | -309(2)  | 45(1)          |
| C(17) | -519(2) | -1610(5) | -85(2)   | 51(1)          |
| C(18) | 312(2)  | -4096(4) | 775(2)   | 45(1)          |
| C(19) | -367(2) | -4533(5) | 1213(2)  | 49(1)          |
| C(20) | 168(2)  | -5868(4) | -283(2)  | 43(1)          |
| C(21) | 108(3)  | -6173(5) | -1102(3) | 58(1)          |
| C(22) | 889(2)  | -3364(4) | -417(2)  | 45(1)          |
| C(23) | 1622(2) | -4194(5) | -317(3)  | 51(1)          |

**Table S-9.** Bond lengths [Å] and angles [deg] for  
(Et<sub>4</sub>N)[Fe<sup>III</sup>S<sub>2</sub><sup>Me<sub>2</sub>N<sup>Me</sup>N<sub>2</sub><sup>amide</sup>(Pr,Pr)] (**8**).</sup>

---

|            |            |
|------------|------------|
| Fe(1)-N(3) | 1.924(3)   |
| Fe(1)-N(1) | 1.934(3)   |
| Fe(1)-S(2) | 2.2100(12) |
| Fe(1)-N(2) | 2.212(3)   |
| Fe(1)-S(1) | 2.2302(10) |
| S(1)-C(3)  | 1.830(4)   |
| S(2)-C(13) | 1.831(4)   |
| O(1)-C(4)  | 1.233(4)   |
| O(2)-C(12) | 1.232(5)   |
| N(2)-C(9B) | 1.442(13)  |
| N(2)-C(7)  | 1.463(8)   |
| N(2)-C(8B) | 1.477(11)  |
| N(2)-C(9)  | 1.481(8)   |
| N(2)-C(8)  | 1.481(7)   |
| N(2)-C(7B) | 1.484(13)  |
| N(1)-C(4)  | 1.347(5)   |
| N(1)-C(5)  | 1.469(5)   |
| N(3)-C(12) | 1.340(5)   |
| N(3)-C(11) | 1.460(5)   |
| N(4)-C(20) | 1.510(4)   |
| N(4)-C(16) | 1.516(5)   |
| N(4)-C(22) | 1.525(4)   |
| N(4)-C(18) | 1.534(5)   |
| C(1)-C(3)  | 1.532(6)   |
| C(1)-H(1A) | 0.9800     |
| C(1)-H(1B) | 0.9800     |
| C(1)-H(1C) | 0.9800     |
| C(2)-C(3)  | 1.516(5)   |
| C(2)-H(2A) | 0.9800     |
| C(2)-H(2B) | 0.9800     |
| C(2)-H(2C) | 0.9800     |
| C(3)-C(4)  | 1.532(5)   |
| C(5)-C(6)  | 1.517(6)   |
| C(5)-H(5A) | 0.9900     |
| C(5)-H(5B) | 0.9900     |
| C(6)-C(7B) | 1.546(15)  |
| C(6)-C(7)  | 1.561(9)   |
| C(6)-H(6A) | 0.9900     |
| C(6)-H(6B) | 0.9900     |
| C(6)-H(6C) | 0.9600     |
| C(6)-H(6D) | 0.9600     |
| C(7)-C(8B) | 1.334(15)  |
| C(7)-C(7B) | 1.413(12)  |
| C(7)-H(7A) | 0.9900     |

|              |           |
|--------------|-----------|
| C(7)-H(7B)   | 0.9900    |
| C(7)-H(8BB)  | 1.2211    |
| C(7B)-C(8)   | 1.444(16) |
| C(7B)-H(7BA) | 0.9601    |
| C(7B)-H(7BB) | 0.9600    |
| C(8)-C(9B)   | 1.285(15) |
| C(8)-H(8A)   | 0.9800    |
| C(8)-H(8B)   | 0.9800    |
| C(8)-H(8C)   | 0.9800    |
| C(8B)-C(9)   | 1.376(16) |
| C(8B)-H(8BA) | 0.9600    |
| C(8B)-H(8BB) | 0.9600    |
| C(8B)-H(8BC) | 0.9600    |
| C(9)-C(9B)   | 1.461(14) |
| C(9)-C(10)   | 1.573(9)  |
| C(9)-H(9A)   | 0.9900    |
| C(9)-H(9B)   | 0.9900    |
| C(9B)-C(10)  | 1.658(16) |
| C(9B)-H(9BA) | 0.9600    |
| C(9B)-H(9BB) | 0.9600    |
| C(10)-C(11)  | 1.518(7)  |
| C(10)-H(10A) | 0.9900    |
| C(10)-H(10B) | 0.9900    |
| C(10)-H(10C) | 0.9600    |
| C(10)-H(10D) | 0.9600    |
| C(11)-H(11A) | 0.9900    |
| C(11)-H(11B) | 0.9900    |
| C(12)-C(13)  | 1.541(5)  |
| C(13)-C(15)  | 1.505(6)  |
| C(13)-C(14)  | 1.528(5)  |
| C(14)-H(14A) | 0.9800    |
| C(14)-H(14B) | 0.9800    |
| C(14)-H(14C) | 0.9800    |
| C(15)-H(15A) | 0.9800    |
| C(15)-H(15B) | 0.9800    |
| C(15)-H(15C) | 0.9800    |
| C(16)-C(17)  | 1.511(5)  |
| C(16)-H(16A) | 0.9900    |
| C(16)-H(16B) | 0.9900    |
| C(17)-H(17A) | 0.9800    |
| C(17)-H(17B) | 0.9800    |
| C(17)-H(17C) | 0.9800    |
| C(18)-C(19)  | 1.503(5)  |
| C(18)-H(18A) | 0.9900    |
| C(18)-H(18B) | 0.9900    |
| C(19)-H(19A) | 0.9800    |
| C(19)-H(19B) | 0.9800    |
| C(19)-H(19C) | 0.9800    |

|                  |            |
|------------------|------------|
| C(20)-C(21)      | 1.513(6)   |
| C(20)-H(20A)     | 0.9900     |
| C(20)-H(20B)     | 0.9900     |
| C(21)-H(21A)     | 0.9800     |
| C(21)-H(21B)     | 0.9800     |
| C(21)-H(21C)     | 0.9800     |
| C(22)-C(23)      | 1.507(6)   |
| C(22)-H(22A)     | 0.9900     |
| C(22)-H(22B)     | 0.9900     |
| C(23)-H(23A)     | 0.9800     |
| C(23)-H(23B)     | 0.9800     |
| C(23)-H(23C)     | 0.9800     |
| N(3)-Fe(1)-N(1)  | 177.83(14) |
| N(3)-Fe(1)-S(2)  | 85.93(10)  |
| N(1)-Fe(1)-S(2)  | 93.76(10)  |
| N(3)-Fe(1)-N(2)  | 89.03(14)  |
| N(2)-Fe(1)-N(1)  | 89.03(14)  |
| S(2)-Fe(1)-N(2)  | 108.43(9)  |
| N(3)-Fe(1)-S(1)  | 96.14(10)  |
| N(1)-Fe(1)-S(1)  | 85.37(9)   |
| S(2)-Fe(1)-S(1)  | 144.40(5)  |
| N(2)-Fe(1)-S(1)  | 107.14(9)  |
| C(3)-S(1)-Fe(1)  | 100.01(12) |
| C(13)-S(2)-Fe(1) | 100.75(13) |
| C(9B)-N(2)-C(7)  | 141.1(6)   |
| C(9B)-N(2)-C(8B) | 111.7(8)   |
| C(7)-N(2)-C(8B)  | 54.0(6)    |
| C(9B)-N(2)-C(9)  | 60.0(6)    |
| C(7)-N(2)-C(9)   | 107.0(4)   |
| C(8B)-N(2)-C(9)  | 55.5(6)    |
| C(9B)-N(2)-C(8)  | 52.1(6)    |
| C(7)-N(2)-C(8)   | 110.5(5)   |
| C(8B)-N(2)-C(8)  | 137.6(6)   |
| C(9)-N(2)-C(8)   | 108.2(5)   |
| C(9B)-N(2)-C(7B) | 108.9(8)   |
| C(7)-N(2)-C(7B)  | 57.3(5)    |
| C(8B)-N(2)-C(7B) | 108.7(7)   |
| C(9)-N(2)-C(7B)  | 142.8(6)   |
| C(8)-N(2)-C(7B)  | 58.3(6)    |
| C(9B)-N(2)-Fe(1) | 109.2(5)   |
| C(7)-N(2)-Fe(1)  | 109.7(3)   |
| C(8B)-N(2)-Fe(1) | 111.3(5)   |
| C(9)-N(2)-Fe(1)  | 110.3(3)   |
| C(8)-N(2)-Fe(1)  | 111.1(3)   |
| C(7B)-N(2)-Fe(1) | 106.9(5)   |
| C(4)-N(1)-C(5)   | 116.9(3)   |
| C(4)-N(1)-Fe(1)  | 124.3(2)   |
| C(5)-N(1)-Fe(1)  | 117.0(3)   |

|                  |          |
|------------------|----------|
| C(12)-N(3)-C(11) | 116.3(3) |
| C(12)-N(3)-Fe(1) | 124.1(3) |
| C(11)-N(3)-Fe(1) | 116.3(3) |
| C(20)-N(4)-C(16) | 109.8(3) |
| C(20)-N(4)-C(22) | 112.0(3) |
| C(16)-N(4)-C(22) | 107.6(3) |
| C(20)-N(4)-C(18) | 108.0(3) |
| C(16)-N(4)-C(18) | 111.0(3) |
| C(22)-N(4)-C(18) | 108.4(3) |
| C(3)-C(1)-H(1A)  | 109.5    |
| C(3)-C(1)-H(1B)  | 109.5    |
| H(1A)-C(1)-H(1B) | 109.5    |
| C(3)-C(1)-H(1C)  | 109.5    |
| H(1A)-C(1)-H(1C) | 109.5    |
| H(1B)-C(1)-H(1C) | 109.5    |
| C(3)-C(2)-H(2A)  | 109.5    |
| C(3)-C(2)-H(2B)  | 109.5    |
| H(2A)-C(2)-H(2B) | 109.5    |
| C(3)-C(2)-H(2C)  | 109.5    |
| H(2A)-C(2)-H(2C) | 109.5    |
| H(2B)-C(2)-H(2C) | 109.5    |
| C(2)-C(3)-C(4)   | 109.5(3) |
| C(2)-C(3)-C(1)   | 109.9(3) |
| C(4)-C(3)-C(1)   | 108.1(3) |
| C(2)-C(3)-S(1)   | 110.7(3) |
| C(4)-C(3)-S(1)   | 109.3(3) |
| C(1)-C(3)-S(1)   | 109.4(3) |
| O(1)-C(4)-N(1)   | 124.4(3) |
| O(1)-C(4)-C(3)   | 120.2(3) |
| N(1)-C(4)-C(3)   | 115.4(3) |
| N(1)-C(5)-C(6)   | 111.4(4) |
| N(1)-C(5)-H(5A)  | 109.3    |
| C(6)-C(5)-H(5A)  | 109.3    |
| N(1)-C(5)-H(5B)  | 109.3    |
| C(6)-C(5)-H(5B)  | 109.3    |
| H(5A)-C(5)-H(5B) | 108.0    |
| C(5)-C(6)-C(7B)  | 113.5(5) |
| C(5)-C(6)-C(7)   | 111.8(4) |
| C(5)-C(6)-H(6A)  | 109.7    |
| C(7B)-C(6)-H(6A) | 57.1     |
| C(7)-C(6)-H(6A)  | 108.7    |
| C(5)-C(6)-H(6B)  | 109.3    |
| C(7B)-C(6)-H(6B) | 137.2    |
| C(7)-C(6)-H(6B)  | 109.2    |
| H(6A)-C(6)-H(6B) | 108.0    |
| C(5)-C(6)-H(6C)  | 109.1    |
| C(7B)-C(6)-H(6C) | 108.4    |
| C(7)-C(6)-H(6C)  | 57.7     |

|                     |          |
|---------------------|----------|
| H(6A)-C(6)-H(6C)    | 141.1    |
| H(6B)-C(6)-H(6C)    | 55.5     |
| C(5)-C(6)-H(6D)     | 109.5    |
| C(7B)-C(6)-H(6D)    | 106.8    |
| C(7)-C(6)-H(6D)     | 138.7    |
| H(6A)-C(6)-H(6D)    | 54.0     |
| H(6B)-C(6)-H(6D)    | 56.9     |
| H(6C)-C(6)-H(6D)    | 109.5    |
| C(8B)-C(7)-N(2)     | 63.5(6)  |
| C(7B)-C(7)-N(2)     | 62.1(6)  |
| C(8B)-C(7)-C(6)     | 166.1(8) |
| C(7B)-C(7)-C(6)     | 62.4(7)  |
| N(2)-C(7)-C(6)      | 114.2(5) |
| C(8B)-C(7)-H(6C)    | 140.2    |
| C(7B)-C(7)-H(6C)    | 97.6     |
| N(2)-C(7)-H(6C)     | 150.5    |
| C(8B)-C(7)-H(7A)    | 60.3     |
| C(7B)-C(7)-H(7A)    | 153.9    |
| N(2)-C(7)-H(7A)     | 105.1    |
| C(6)-C(7)-H(7A)     | 109.4    |
| H(6C)-C(7)-H(7A)    | 83.9     |
| C(8B)-C(7)-H(7B)    | 82.1     |
| C(7B)-C(7)-H(7B)    | 97.4     |
| N(2)-C(7)-H(7B)     | 108.4    |
| C(6)-C(7)-H(7B)     | 111.0    |
| H(6C)-C(7)-H(7B)    | 94.6     |
| H(7A)-C(7)-H(7B)    | 108.5    |
| N(2)-C(7)-H(8BB)    | 97.5     |
| C(6)-C(7)-H(8BB)    | 126.8    |
| H(6C)-C(7)-H(8BB)   | 97.9     |
| H(7B)-C(7)-H(8BB)   | 96.6     |
| C(8)-C(7B)-N(2)     | 60.8(6)  |
| C(8)-C(7B)-C(6)     | 171.0(9) |
| N(2)-C(7B)-C(6)     | 113.9(8) |
| C(8)-C(7B)-H(7BA)   | 69.0     |
| N(2)-C(7B)-H(7BA)   | 110.4    |
| C(6)-C(7B)-H(7BA)   | 108.3    |
| H(6A)-C(7B)-H(7BA)  | 77.9     |
| C(7)-C(7B)-H(7BB)   | 92.4     |
| C(8)-C(7B)-H(7BB)   | 81.7     |
| N(2)-C(7B)-H(7BB)   | 107.4    |
| C(6)-C(7B)-H(7BB)   | 107.2    |
| H(6A)-C(7B)-H(7BB)  | 95.0     |
| H(7BA)-C(7B)-H(7BB) | 109.5    |
| C(9B)-C(8)-C(7B)    | 121.3(8) |
| C(9B)-C(8)-N(2)     | 62.4(6)  |
| C(7B)-C(8)-N(2)     | 60.9(5)  |
| C(9B)-C(8)-H(7BA)   | 148.4    |

|                     |          |
|---------------------|----------|
| N(2)-C(8)-H(7BA)    | 88.8     |
| C(9B)-C(8)-H(8A)    | 81.5     |
| C(7B)-C(8)-H(8A)    | 98.9     |
| N(2)-C(8)-H(8A)     | 104.5    |
| H(7BA)-C(8)-H(8A)   | 120.4    |
| C(9B)-C(8)-H(8B)    | 54.7     |
| C(7B)-C(8)-H(8B)    | 149.4    |
| N(2)-C(8)-H(8B)     | 99.8     |
| H(7BA)-C(8)-H(8B)   | 125.2    |
| H(8A)-C(8)-H(8B)    | 109.5    |
| C(9B)-C(8)-H(8C)    | 163.8    |
| C(7B)-C(8)-H(8C)    | 69.9     |
| N(2)-C(8)-H(8C)     | 123.3    |
| H(8A)-C(8)-H(8C)    | 109.5    |
| H(8B)-C(8)-H(8C)    | 109.5    |
| C(7B)-C(8)-H(9BA)   | 119.2    |
| N(2)-C(8)-H(9BA)    | 83.7     |
| H(7BA)-C(8)-H(9BA)  | 156.3    |
| H(8B)-C(8)-H(9BA)   | 78.2     |
| H(8C)-C(8)-H(9BA)   | 148.3    |
| C(7B)-C(8)-H(9BB)   | 148.7    |
| N(2)-C(8)-H(9BB)    | 93.0     |
| H(7BA)-C(8)-H(9BB)  | 132.8    |
| H(8A)-C(8)-H(9BB)   | 104.7    |
| H(8C)-C(8)-H(9BB)   | 119.4    |
| H(9BA)-C(8)-H(9BB)  | 70.2     |
| C(7)-C(8B)-C(9)     | 121.7(9) |
| C(7)-C(8B)-N(2)     | 62.5(6)  |
| C(9)-C(8B)-N(2)     | 62.4(6)  |
| C(7)-C(8B)-H(7A)    | 45.6     |
| C(9)-C(8B)-H(7A)    | 152.8    |
| N(2)-C(8B)-H(7A)    | 94.0     |
| C(9)-C(8B)-H(7B)    | 116.5    |
| N(2)-C(8B)-H(7B)    | 83.2     |
| H(7A)-C(8B)-H(7B)   | 70.1     |
| C(7)-C(8B)-H(8BA)   | 90.8     |
| C(9)-C(8B)-H(8BA)   | 90.1     |
| N(2)-C(8B)-H(8BA)   | 109.3    |
| H(7A)-C(8B)-H(8BA)  | 111.6    |
| H(7B)-C(8B)-H(8BA)  | 51.6     |
| C(7)-C(8B)-H(8BB)   | 61.8     |
| C(9)-C(8B)-H(8BB)   | 160.3    |
| N(2)-C(8B)-H(8BB)   | 110.6    |
| H(7B)-C(8B)-H(8BB)  | 78.9     |
| H(8BA)-C(8B)-H(8BB) | 109.5    |
| C(7)-C(8B)-H(8BC)   | 159.8    |
| C(9)-C(8B)-H(8BC)   | 60.1     |
| N(2)-C(8B)-H(8BC)   | 108.5    |



|                     |           |
|---------------------|-----------|
| H(7A)-C(8B)-H(8BC)  | 122.3     |
| H(7B)-C(8B)-H(8BC)  | 160.9     |
| H(8BA)-C(8B)-H(8BC) | 109.5     |
| H(8BB)-C(8B)-H(8BC) | 109.5     |
| C(7)-C(8B)-H(9B)    | 154.1     |
| N(2)-C(8B)-H(9B)    | 94.1      |
| H(7A)-C(8B)-H(9B)   | 133.6     |
| H(7B)-C(8B)-H(9B)   | 156.2     |
| H(8BA)-C(8B)-H(9B)  | 108.4     |
| H(8BB)-C(8B)-H(9B)  | 123.6     |
| C(8B)-C(9)-C(9B)    | 116.7(9)  |
| C(8B)-C(9)-N(2)     | 62.1(6)   |
| C(9B)-C(9)-N(2)     | 58.7(6)   |
| C(8B)-C(9)-C(10)    | 165.7(8)  |
| C(9B)-C(9)-C(10)    | 66.1(7)   |
| N(2)-C(9)-C(10)     | 113.5(5)  |
| C(9B)-C(9)-H(8BC)   | 153.3     |
| N(1)-C(9)-H(8BC)    | 95.0      |
| C(10)-C(9)-H(8BC)   | 128.7     |
| C(8B)-C(9)-H(9A)    | 84.1      |
| C(9B)-C(9)-H(9A)    | 94.5      |
| N(2)-C(9)-H(9A)     | 108.5     |
| C(10)-C(9)-H(9A)    | 110.0     |
| H(8BC)-C(9)-H(9A)   | 98.9      |
| C(8B)-C(9)-H(9B)    | 61.5      |
| C(9B)-C(9)-H(9B)    | 156.6     |
| N(2)-C(9)-H(9B)     | 106.8     |
| C(10)-C(9)-H(9B)    | 109.8     |
| H(9A)-C(9)-H(9B)    | 108.1     |
| C(8B)-C(9)-H(10C)   | 139.4     |
| C(9B)-C(9)-H(10C)   | 103.0     |
| N(2)-C(9)-H(10C)    | 145.7     |
| H(8BC)-C(9)-H(10C)  | 96.9      |
| H(9A)-C(9)-H(10C)   | 101.3     |
| H(9B)-C(9)-H(10C)   | 78.8      |
| C(8)-C(9B)-N(2)     | 65.5(7)   |
| C(8)-C(9B)-C(9)     | 121.6(11) |
| N(2)-C(9B)-C(9)     | 61.3(6)   |
| C(8)-C(9B)-C(10)    | 169.7(10) |
| N(2)-C(9B)-C(10)    | 110.8(8)  |
| C(9)-C(9B)-C(10)    | 60.2(6)   |
| N(2)-C(9B)-H(8A)    | 84.2      |
| C(9)-C(9B)-H(8A)    | 110.8     |
| C(10)-C(9B)-H(8A)   | 149.9     |
| C(8)-C(9B)-H(8B)    | 48.1      |
| N(2)-C(9B)-H(8B)    | 97.7      |
| C(9)-C(9B)-H(8B)    | 156.4     |
| C(10)-C(9B)-H(8B)   | 125.8     |

|                     |          |
|---------------------|----------|
| H(8A)-C(9B)-H(8B)   | 75.0     |
| C(8)-C(9B)-H(9BA)   | 80.7     |
| N(2)-C(9B)-H(9BA)   | 108.6    |
| C(9)-C(9B)-H(9BA)   | 94.5     |
| C(10)-C(9B)-H(9BA)  | 109.5    |
| H(8B)-C(9B)-H(9BA)  | 103.1    |
| C(8)-C(9B)-H(9BB)   | 64.6     |
| N(2)-C(9B)-H(9BB)   | 108.9    |
| C(9)-C(9B)-H(9BB)   | 156.1    |
| C(10)-C(9B)-H(9BB)  | 109.5    |
| H(8A)-C(9B)-H(9BB)  | 88.5     |
| H(9BA)-C(9B)-H(9BB) | 109.5    |
| C(8)-C(9B)-H(10B)   | 146.2    |
| N(2)-C(9B)-H(10B)   | 146.9    |
| C(9)-C(9B)-H(10B)   | 91.6     |
| H(8A)-C(9B)-H(10B)  | 125.6    |
| H(8B)-C(9B)-H(10B)  | 103.6    |
| H(9BA)-C(9B)-H(10B) | 91.0     |
| H(9BB)-C(9B)-H(10B) | 88.1     |
| C(11)-C(10)-C(9)    | 115.3(4) |
| C(11)-C(10)-C(9B)   | 106.2(5) |
| C(9)-C(10)-C(9B)    | 53.7(5)  |
| C(11)-C(10)-H(10A)  | 108.0    |
| C(9)-C(10)-H(10A)   | 107.8    |
| C(9B)-C(10)-H(10A)  | 145.7    |
| C(11)-C(10)-H(10B)  | 109.0    |
| C(9)-C(10)-H(10B)   | 108.9    |
| C(9B)-C(10)-H(10B)  | 62.3     |
| H(10A)-C(10)-H(10B) | 107.6    |
| C(11)-C(10)-H(10C)  | 111.2    |
| C(9)-C(10)-H(10C)   | 56.0     |
| C(9B)-C(10)-H(10C)  | 108.8    |
| H(10A)-C(10)-H(10C) | 55.7     |
| H(10B)-C(10)-H(10C) | 139.6    |
| C(11)-C(10)-H(10D)  | 110.7    |
| C(9)-C(10)-H(10D)   | 133.9    |
| C(9B)-C(10)-H(10D)  | 110.4    |
| H(10A)-C(10)-H(10D) | 58.7     |
| H(10B)-C(10)-H(10D) | 50.7     |
| H(10C)-C(10)-H(10D) | 109.5    |
| N(3)-C(11)-C(10)    | 112.2(3) |
| N(3)-C(11)-H(11A)   | 109.2    |
| C(10)-C(11)-H(11A)  | 109.2    |
| N(3)-C(11)-H(11B)   | 109.2    |
| C(10)-C(11)-H(11B)  | 109.2    |
| H(11A)-C(11)-H(11B) | 107.9    |
| O(2)-C(12)-N(3)     | 125.5(4) |
| O(2)-C(12)-C(13)    | 118.9(4) |

|                     |          |
|---------------------|----------|
| N(3)-C(12)-C(13)    | 115.4(3) |
| C(15)-C(13)-C(14)   | 109.0(3) |
| C(15)-C(13)-C(12)   | 109.3(3) |
| C(14)-C(13)-C(12)   | 109.9(3) |
| C(15)-C(13)-S(2)    | 110.9(3) |
| C(14)-C(13)-S(2)    | 109.0(3) |
| C(12)-C(13)-S(2)    | 108.8(3) |
| C(13)-C(14)-H(14A)  | 109.5    |
| C(13)-C(14)-H(14B)  | 109.5    |
| H(14A)-C(14)-H(14B) | 109.5    |
| C(13)-C(14)-H(14C)  | 109.5    |
| H(14A)-C(14)-H(14C) | 109.5    |
| H(14B)-C(14)-H(14C) | 109.5    |
| C(13)-C(15)-H(15A)  | 109.5    |
| C(13)-C(15)-H(15B)  | 109.5    |
| H(15A)-C(15)-H(15B) | 109.5    |
| C(13)-C(15)-H(15C)  | 109.5    |
| H(15A)-C(15)-H(15C) | 109.5    |
| H(15B)-C(15)-H(15C) | 109.5    |
| C(17)-C(16)-N(4)    | 115.8(3) |
| C(17)-C(16)-H(16A)  | 108.3    |
| N(4)-C(16)-H(16A)   | 108.3    |
| C(17)-C(16)-H(16B)  | 108.3    |
| N(4)-C(16)-H(16B)   | 108.3    |
| H(16A)-C(16)-H(16B) | 107.4    |
| C(16)-C(17)-H(17A)  | 109.5    |
| C(16)-C(17)-H(17B)  | 109.5    |
| H(17A)-C(17)-H(17B) | 109.5    |
| C(16)-C(17)-H(17C)  | 109.5    |
| H(17A)-C(17)-H(17C) | 109.5    |
| H(17B)-C(17)-H(17C) | 109.5    |
| C(19)-C(18)-N(4)    | 115.4(3) |
| C(19)-C(18)-H(18A)  | 108.4    |
| N(4)-C(18)-H(18A)   | 108.4    |
| C(19)-C(18)-H(18B)  | 108.4    |
| N(4)-C(18)-H(18B)   | 108.4    |
| H(18A)-C(18)-H(18B) | 107.5    |
| C(18)-C(19)-H(19A)  | 109.5    |
| C(18)-C(19)-H(19B)  | 109.5    |
| H(19A)-C(19)-H(19B) | 109.5    |
| C(18)-C(19)-H(19C)  | 109.5    |
| H(19A)-C(19)-H(19C) | 109.5    |
| H(19B)-C(19)-H(19C) | 109.5    |
| N(4)-C(20)-C(21)    | 115.5(3) |
| N(4)-C(20)-H(20A)   | 108.4    |
| C(21)-C(20)-H(20A)  | 108.4    |
| N(4)-C(20)-H(20B)   | 108.4    |
| C(21)-C(20)-H(20B)  | 108.4    |

|                     |          |
|---------------------|----------|
| H(20A)-C(20)-H(20B) | 107.5    |
| C(20)-C(21)-H(21A)  | 109.5    |
| C(20)-C(21)-H(21B)  | 109.5    |
| H(21A)-C(21)-H(21B) | 109.5    |
| C(20)-C(21)-H(21C)  | 109.5    |
| H(21A)-C(21)-H(21C) | 109.5    |
| H(21B)-C(21)-H(21C) | 109.5    |
| C(23)-C(22)-N(4)    | 115.0(3) |
| C(23)-C(22)-H(22A)  | 108.5    |
| N(4)-C(22)-H(22A)   | 108.5    |
| C(23)-C(22)-H(22B)  | 108.5    |
| N(4)-C(22)-H(22B)   | 108.5    |
| H(22A)-C(22)-H(22B) | 107.5    |
| C(22)-C(23)-H(23A)  | 109.5    |
| C(22)-C(23)-H(23B)  | 109.5    |
| H(23A)-C(23)-H(23B) | 109.5    |
| C(22)-C(23)-H(23C)  | 109.5    |
| H(23A)-C(23)-H(23C) | 109.5    |
| H(23B)-C(23)-H(23C) | 109.5    |

---

Symmetry transformations used to generate equivalent atoms:

**Table S-10.** Anisotropic displacement parameters ( $\text{\AA}^2 \times 10^3$ ) for  $(\text{Et}_4\text{N})[\text{Fe}^{\text{III}}\text{S}_2^{\text{Me}_2\text{N}^{\text{Me}}\text{N}_2^{\text{amide}}}(\text{Pr},\text{Pr})]$  (**8**). The anisotropic displacement factor exponent takes the form:  $-2 \pi^2 [h^2 a^* U_{11} + \dots + 2 h k a^* b^* U_{12}]$

|       | U11   | U22     | U33   | U23    | U13    | U12    |
|-------|-------|---------|-------|--------|--------|--------|
| Fe(1) | 38(1) | 45(1)   | 35(1) | 2(1)   | -2(1)  | -2(1)  |
| S(1)  | 39(1) | 42(1)   | 51(1) | -4(1)  | 0(1)   | -3(1)  |
| S(2)  | 58(1) | 46(1)   | 40(1) | 5(1)   | 6(1)   | 4(1)   |
| O(1)  | 57(2) | 50(2)   | 47(2) | -10(1) | 7(1)   | -5(1)  |
| O(2)  | 48(2) | 51(2)   | 62(2) | 6(2)   | 14(1)  | 8(1)   |
| N(2)  | 39(2) | 63(2)   | 43(2) | 6(2)   | -4(2)  | -9(2)  |
| N(1)  | 53(2) | 40(2)   | 39(2) | -3(1)  | 4(2)   | -7(1)  |
| N(3)  | 39(2) | 43(2)   | 47(2) | 9(2)   | 2(2)   | 2(1)   |
| N(4)  | 42(2) | 37(2)   | 38(2) | 3(1)   | 6(1)   | 2(1)   |
| C(1)  | 45(2) | 50(2)   | 44(2) | -8(2)  | -3(2)  | 1(2)   |
| C(2)  | 55(2) | 44(2)   | 49(2) | 3(2)   | 6(2)   | -5(2)  |
| C(3)  | 42(2) | 43(2)   | 36(2) | 0(2)   | 0(2)   | -2(2)  |
| C(4)  | 51(2) | 44(2)   | 31(2) | 2(2)   | -2(2)  | 4(2)   |
| C(5)  | 60(3) | 51(2)   | 46(2) | -3(2)  | 2(2)   | -17(2) |
| C(6)  | 64(3) | 74(3)   | 54(3) | -15(2) | -5(2)  | -24(2) |
| C(7)  | 42(4) | 78(5)   | 41(4) | 9(3)   | -14(3) | -16(4) |
| C(7B) | 37(6) | 105(11) | 38(6) | 5(6)   | -4(5)  | -30(6) |
| C(8)  | 50(4) | 84(6)   | 37(4) | 18(4)  | 1(3)   | -14(4) |
| C(8B) | 35(6) | 113(12) | 52(7) | -14(7) | -3(5)  | -31(7) |
| C(9)  | 37(4) | 94(6)   | 43(4) | -1(4)  | -3(3)  | -2(4)  |
| C(9B) | 42(7) | 98(10)  | 51(7) | 25(7)  | -5(6)  | -9(6)  |
| C(10) | 75(3) | 73(3)   | 75(3) | 18(3)  | -23(3) | 22(2)  |
| C(11) | 43(2) | 55(2)   | 62(3) | 15(2)  | 1(2)   | 6(2)   |
| C(12) | 36(2) | 50(2)   | 45(2) | 7(2)   | 1(2)   | 0(2)   |
| C(13) | 39(2) | 48(2)   | 40(2) | 2(2)   | 1(2)   | 4(2)   |
| C(14) | 48(2) | 47(2)   | 62(3) | 11(2)  | 2(2)   | -2(2)  |
| C(15) | 54(2) | 53(2)   | 43(2) | 5(2)   | -3(2)  | -4(2)  |
| C(16) | 49(2) | 42(2)   | 44(2) | 3(2)   | 1(2)   | 7(2)   |
| C(17) | 53(2) | 45(2)   | 55(3) | -2(2)  | -2(2)  | 9(2)   |
| C(18) | 50(2) | 49(2)   | 36(2) | 1(2)   | 4(2)   | 1(2)   |
| C(19) | 50(2) | 52(2)   | 44(2) | 5(2)   | 8(2)   | -1(2)  |
| C(20) | 47(2) | 35(2)   | 45(2) | 1(2)   | 2(2)   | 6(2)   |
| C(21) | 75(3) | 47(2)   | 52(3) | -10(2) | -1(2)  | 1(2)   |
| C(22) | 51(2) | 41(2)   | 42(2) | 2(2)   | 8(2)   | -5(2)  |
| C(23) | 46(2) | 52(2)   | 55(3) | 4(2)   | 12(2)  | -3(2)  |

**Table S-11.** Hydrogen coordinates (  $\times 10^4$ ) and isotropic displacement parameters ( $\text{\AA}^2 \times 10^3$ ) for  $(\text{Et}_4\text{N})[\text{Fe}^{\text{III}}\text{S}_2\text{Me}_2\text{N}^{\text{amide}}\text{N}_2(\text{Pr},\text{Pr})]$  (**8**).

|        | x     | y     | z    | U(eq) |
|--------|-------|-------|------|-------|
| H(1A)  | -1097 | 1952  | 1734 | 56    |
| H(1B)  | -1064 | 181   | 1454 | 56    |
| H(1C)  | -463  | 1420  | 1168 | 56    |
| H(2A)  | -1111 | 831   | 2990 | 59    |
| H(2B)  | -396  | -54   | 3309 | 59    |
| H(2C)  | -939  | -928  | 2745 | 59    |
| H(5A)  | 917   | 4557  | 2571 | 63    |
| H(5B)  | 1548  | 4152  | 1978 | 63    |
| H(6A)  | 1526  | 2829  | 3429 | 77    |
| H(6B)  | 2026  | 4309  | 3213 | 77    |
| H(6C)  | 2288  | 3706  | 2894 | 77    |
| H(6D)  | 1638  | 3832  | 3467 | 77    |
| H(7A)  | 2651  | 2624  | 2296 | 64    |
| H(7B)  | 2830  | 2131  | 3131 | 64    |
| H(7BA) | 1360  | 1195  | 3301 | 72    |
| H(7BB) | 2169  | 1443  | 3605 | 72    |
| H(8A)  | 2254  | -270  | 3568 | 68    |
| H(8B)  | 1695  | -1124 | 3012 | 68    |
| H(8C)  | 1412  | 323   | 3494 | 68    |
| H(8BA) | 3233  | 1267  | 2782 | 80    |
| H(8BB) | 2840  | 2401  | 2227 | 80    |
| H(8BC) | 3103  | 745   | 1965 | 80    |
| H(9A)  | 3208  | -223  | 2769 | 70    |
| H(9B)  | 3063  | 254   | 1927 | 70    |
| H(9BA) | 2547  | -982  | 3253 | 76    |
| H(9BB) | 1768  | -1381 | 2911 | 76    |
| H(10A) | 3137  | -2527 | 2008 | 89    |
| H(10B) | 2498  | -2569 | 2619 | 89    |
| H(10C) | 3093  | -1467 | 1986 | 89    |
| H(10D) | 2825  | -3011 | 2367 | 89    |
| H(11A) | 2272  | -3088 | 1223 | 64    |
| H(11B) | 1622  | -2641 | 1788 | 64    |
| H(14A) | 3222  | 980   | -456 | 63    |
| H(14B) | 3335  | 1795  | 329  | 63    |
| H(14C) | 2910  | 2706  | -316 | 63    |
| H(15A) | 1991  | -99   | -800 | 60    |
| H(15B) | 1713  | 1676  | -770 | 60    |
| H(15C) | 1275  | 356   | -320 | 60    |
| H(16A) | -505  | -3369 | -852 | 54    |

|        |       |       |       |    |
|--------|-------|-------|-------|----|
| H(16B) | -912  | -3859 | -106  | 54 |
| H(17A) | -1028 | -1229 | -161  | 61 |
| H(17B) | -174  | -995  | -386  | 61 |
| H(17C) | -385  | -1505 | 435   | 61 |
| H(18A) | 724   | -4801 | 919   | 54 |
| H(18B) | 459   | -3021 | 912   | 54 |
| H(19A) | -248  | -4514 | 1740  | 58 |
| H(19B) | -530  | -5584 | 1073  | 58 |
| H(19C) | -767  | -3784 | 1112  | 58 |
| H(20A) | -273  | -6329 | -38   | 51 |
| H(20B) | 613   | -6420 | -94   | 51 |
| H(21A) | 83    | -7302 | -1190 | 69 |
| H(21B) | 545   | -5741 | -1352 | 69 |
| H(21C) | -344  | -5675 | -1294 | 69 |
| H(22A) | 792   | -3252 | -951  | 53 |
| H(22B) | 933   | -2300 | -208  | 53 |
| H(23A) | 2030  | -3498 | -462  | 61 |
| H(23B) | 1631  | -5135 | -624  | 61 |
| H(23C) | 1682  | -4489 | 201   | 61 |

---

References:

Instrument: Nonius KappaCCD

Nonius (1997). KappaCCD Operations Manual, Delft.

Data Collection Software: Collect, (1998), Data Collection Software, Nonius.

Data Reduction: HKL Scalepack (Otwinowski & Minor 1997)

Otinowski, Z., Minor, W., (1996). Processing of X-ray Diffraction Data Collected in Oscillation Mode, Methods in Enzymology, 276, 307-326., C. W. Carter, Jr., R. M. Sweet, Eds., Academic Press.

Cell Refinement: HKL Scalepack (Otwinowski & Minor 1997)

ibid.

Structure Solution: SIR97

Altomare, A., Cascarano, G., Giacovazzo, C., Burla, M.C., Polidori, G., Camalli, M., (1994)., SIR. J. Appl. Cryst. 27, 435-442.

Structure Refinement: SHELXL-97 (Sheldrick, 1997)

Sheldrick, G.M. (1997). SHELXL97, Program for the Refinement of Crystal Structures. Univ. of Gottingen, Germany.

Molecular Graphics: maXus, Zortep

maXus: MacKay, S., Gilmore, C.J., Edwards, C., Tremayne M., Stewart, N., Shankland, K., (1998), "maXus: a computer program for the solution and refinement of crystal structures from diffraction data" University of Glasgow, Scotland, UK, Nonius BV,



Delft, The Netherlands and  
MacScience Co. Ltd., Yokohama,  
Japan.

Zortep: L. Zsolnai, G. Huttner, (1994),  
University of Heidelberg.
